## Vimentin is Required for Tumor Progression and Metastasis in a Mouse Model of Non-Small Cell Lung Cancer

Alexandra L. Berr<sup>1,2</sup>, Kristin Wiese<sup>2</sup>, Gimena dos Santos<sup>2</sup>, Jennifer M. Davis<sup>2</sup>, Clarissa M. Koch<sup>2</sup>, Kishore R. Anekalla<sup>2</sup>, Martha Kidd<sup>2</sup>, Yuan Cheng<sup>2</sup>, Yuan-Shih Hu<sup>2</sup>, Karen M. Ridge<sup>2,3</sup>

<sup>1</sup>Department of Biomedical Engineering, Northwestern University, Chicago, IL, USA

<sup>2</sup>Division of Pulmonary and Critical Care Medicine, Northwestern University, Chicago, IL, USA

<sup>3</sup>Department of Cell and Molecular Biology, Northwestern University, Chicago, IL, USA

Supported by: A.B. and K.W. were supported by NIH/NHLBI T32 HL076139; K.R.A. was supported by David and Christine Cugell Fellowship; K.M.R. was supported by NIH P01HL071643, R01HL128194, P01AG049665.

Corresponding Author:

Karen M. Ridge, PhD  
Northwestern University  
Division of Pulmonary and Critical Care  
Department of Cell and Molecular Biology  
303 E. Superior Avenue  
SQBRC 5-520  
Chicago, IL 60611  
[kridge@northwestern.edu](mailto:kridge@northwestern.edu)

1 **Abstract**

2 Vimentin, a type III intermediate filament, is highly expressed in aggressive epithelial  
3 cancers and is associated with increased rates of metastasis. We show that vimentin is causally  
4 required for lung cancer metastasis using a genetic mouse model of lung adenocarcinoma (*LSL-*  
5 *Kras*<sup>G12D</sup>;*Tp53*<sup>fl/fl</sup>, termed *KPV*<sup>+/+</sup>) crossed with vimentin-null mice (thereby creating *KPV*<sup>-/-</sup> mice).  
6 Both *KPV*<sup>+/+</sup> and *KPV*<sup>-/-</sup> mice developed lung tumors, yet *KPV*<sup>-/-</sup> mice had delayed tumorigenesis  
7 and prolonged survival. *KPV*<sup>+/+</sup> cells implanted in the flank metastasized to the lung while *KPV*<sup>-/-</sup>  
8 cells did not, providing additional evidence that vimentin is required for metastasis. Differential  
9 expression analysis of RNA-seq data demonstrated that *KPV*<sup>-/-</sup> cells had suppressed expression  
10 of genes that drive epithelial-to-mesenchymal transition, migration, and invasion, processes that  
11 are critical to the metastatic cascade. Integrative metabolomic and transcriptomic analysis  
12 revealed altered glutaminolysis, with *KPV*<sup>-/-</sup> cells accumulating glutathione, leading to impaired  
13 cell motility in response to oxidative stress. Together, these results show that loss of vimentin  
14 impairs epithelial-to-mesenchymal transition and regulation of the oxidative stress response,  
15 resulting in decreased metastasis in murine lung adenocarcinoma.

16

17

18

## 19 Introduction

20 Non-small-cell lung cancers (NSCLCs) represent 80% of all lung cancers and are often  
21 diagnosed at more advanced stages of the disease resulting in high rates of mortality (1).  
22 Adenocarcinoma is the most common subtype of NSCLC and is characterized by activating  
23 mutations in the *Kras* proto-oncogene in up to 30% of diagnoses and by inactivating mutations in  
24 the tumor suppressor gene *Tp53* in up to 60% of diagnoses (2-5). Despite the prevalence of lung  
25 adenocarcinoma, the metastatic mechanisms that drive lung cancer progression are incompletely  
26 understood.

27 The type III intermediate filament vimentin is associated with increased metastatic spread  
28 and lower rates of survival in patients with NSCLC (6-8). Vimentin is a canonical marker of  
29 epithelial-to-mesenchymal transition (EMT), an initiating event of the metastatic cascade (9). EMT  
30 is the process by which epithelial cells remodel cell-cell and cell-extracellular-matrix (ECM)  
31 contacts, lose their apical-basal polarity, and adopt the spindle-shaped morphology associated  
32 with a mesenchymal cell phenotype (10). During EMT, cells undergo a downregulation of  
33 epithelial cell associated genes, including E-cadherin and cytokeratins, and an upregulation of  
34 mesenchymal cell associated genes, including N-cadherin and vimentin. In addition to acting as  
35 a marker of EMT, vimentin is functionally involved in EMT. Structurally, vimentin intermediate  
36 filaments control cell shape, and thus facilitate the transition toward a mesenchymal phenotype  
37 (11). Twist1, a transcription factor critical to EMT, upregulates vimentin expression (12). Vimentin  
38 also serves as a scaffold for Slug, another transcription factor that regulates EMT (13). Ultimately,  
39 EMT leads to an increase in epithelial-derived cell motility, which marks the first step in cancer  
40 metastasis. Our laboratory has previously shown that vimentin is required for the EMT-like  
41 process responsible for epithelial wound repair (14). In addition to its role in EMT, vimentin  
42 cooperates with actin and microtubules to mediate invasion across the basement membrane and  
43 migration through the collagen-rich interstitial space. Cancer cells form invadopodia,  
44 proteolytically active plasma membrane projections that break down the basement membrane

45 (15). Through an indirect interaction with actin, vimentin intermediate filaments participate in the  
46 elongation of invadopodia, which allows cells to traverse the basement membrane and escape  
47 from the primary tumor site toward the nearest capillary. As a cell begins to migrate, vimentin is  
48 crucial for the development of cellular polarity, which is necessary for the efficient migration of  
49 tumor cells (16). This cancer cell migration is mediated through activation of the PI3K/Akt  
50 pathway. Within this signaling cascade, Akt1 phosphorylates vimentin, which leads to  
51 downstream increases in cell motility by protecting vimentin filaments from proteolysis (17). When  
52 the PI3K/Akt pathway is blocked, vimentin expression is attenuated; this decrease in vimentin is  
53 associated with a lower rate of pulmonary metastases in a murine breast cancer model (18).  
54 Together, these mechanisms are responsible for a decrease in migration, invasion, and  
55 metastasis conferred by a loss of vimentin in lung, breast, head and neck, and bone cancer cells  
56 (11, 17-24).

57 Although numerous studies have provided correlative data and *in vitro* data to establish  
58 the link between vimentin and aspects of the metastatic cascade, none have provided evidence  
59 to suggest that vimentin plays a causal role in NSCLC metastasis. Therefore, we set out to  
60 characterize the role of vimentin in NSCLC metastasis using a genetically engineered mouse  
61 model (GEMM). In the present study, we used the well-established *LSL-Kras*<sup>G12D</sup>;*Tp53*<sup>fl/fl</sup> (*KPV*<sup>+/+</sup>)  
62 mouse model, which reliably recapitulates human NSCLC in pathology, disease progression,  
63 clinical outcome, and response to therapies (25). To identify the role of vimentin in lung  
64 adenocarcinoma, we crossed this GEMM with the global vimentin knockout (*Vim*<sup>-/-</sup>), thereby  
65 creating *KPV*<sup>-/-</sup> mice (26).

66 In this study, we show that *KPV*<sup>-/-</sup> mice have reduced lung tumor burden and increased  
67 rates of survival compared to *KPV*<sup>+/+</sup> mice. Of note, *KPV*<sup>-/-</sup> cells have significantly impaired  
68 metastatic potential. Mechanistically, we find that *KPV*<sup>-/-</sup> cells display impaired EMT; RNA  
69 sequencing (RNA-seq) and cell motility assays reveal that *KPV*<sup>-/-</sup> cells fail to adopt a  
70 mesenchymal phenotype while *KPV*<sup>+/+</sup> cells do. Our data suggest that the targeted loss of vimentin

71 may serve as a therapeutic strategy by which to disrupt the development of lung adenocarcinoma  
72 and suppress metastasis.

73

## 74 **Results**

### 75 ***Generation of an $LSL-Kras^{G12D/+};Tp53^{fl/fl};Vim^{-/-}$ ( $KPV^{-/-}$ ) genetically engineered mouse*** 76 ***model***

77 Tumorigenesis and metastasis are well characterized in the  $LSL-Kras^{G12D/+};Tp53^{fl/fl}$  ( $KPV^{+/+}$ )  
78 GEMM (25). When adenoviral Cre recombinase (Ad-Cre) is delivered intratracheally to  $KPV^{+/+}$   
79 mice, tumors develop as early as 2 weeks post-infection (wpi) (25). This model recapitulates the  
80 highly invasive nature of lung adenocarcinoma with ~50% of mice developing metastatic lesions  
81 in the mediastinal lymph nodes and the pleural spaces of the thoracic cavity (27). We crossed a  
82 global vimentin knockout mouse to the  $KPV^{+/+}$  mouse to create the  $KPV^{-/-}$  mouse (26) (**SI**  
83 **Appendix, S1A**). This novel  $KPV^{-/-}$  mouse lacks vimentin expression throughout the lungs at  
84 baseline (**SI Appendix, S1B**). Following Ad-Cre administration, disruption of the *Kras* allele and  
85 accumulation of mutant KRAS protein was validated by reverse transcription polymerase chain  
86 reaction (RT-PCR) and Western blot, respectively (**SI Appendix, S1C-D**). *Rosa26-LSL-LacZ*  
87 reporter mice were used to validate the intratracheal delivery of Ad-Cre (28). Mice infected with  
88 Ad-Cre demonstrated homogenous, positive lacZ expression, while mice treated with adenoviral  
89 null construct (Ad-null) did not express lacZ (**SI Appendix, S1E**). These results demonstrate the  
90 utility of a novel  $KPV^{-/-}$  GEMM to define a causal role of vimentin in lung adenocarcinoma  
91 metastasis.

92

### 93 ***Vimentin deficiency increases survival and reduces tumor burden***

94 Weight loss, also termed “cancer cachexia,” is a common manifestation of morbidity in human  
95 cancer patients and is associated with a poor prognosis in patients with advanced disease.  $KPV^{+/+}$   
96 and  $KPV^{-/-}$  mice were administered Ad-Cre and their weight was recorded weekly.  $KPV^{+/+}$  mice

97 showed a rapid and profound decline in total body weight starting at 4 wpi, while  $KPV^{-/-}$  mice did  
98 not exhibit weight loss until 9 wpi, suggesting less advanced disease in the vimentin-deficient  
99 mice (**Figure 1A**).  $KPV^{-/-}$  mice lived significantly longer than  $KPV^{+/+}$  mice, with a median survival  
100 of 15.5 wpi compared to 10 wpi in the  $KPV^{+/+}$  mice (**Figure 1B**). Lung tumor development was  
101 confirmed in  $KPV^{+/+}$  and  $KPV^{-/-}$  mice using magnetic resonance imaging (MRI). At 6 wpi,  $KPV^{-/-}$   
102 mice had an average lung tumor burden of 7.5%, which was significantly lower than that of 37%  
103 seen in  $KPV^{+/+}$  mice (**Figure 1C, SI Appendix, S2A**). Lungs were harvested, fixed, and stained  
104 with hematoxylin and eosin (H&E).  $KPV^{+/+}$  mice displayed a greater increase in hyperplastic  
105 lesions at 8 wpi ( $36 \pm 5$  hyperplasias per  $KPV^{+/+}$  mouse vs.  $14 \pm 2$  hyperplasias per  $KPV^{-/-}$  mouse).  
106 At 12 wpi,  $KPV^{+/+}$  mice displayed increased numbers of both adenomas and adenocarcinomas  
107 ( $6.3 \pm 1.8$  adenomas and  $1.2 \pm 0.2$  adenocarcinomas per  $KPV^{+/+}$  mouse) compared to  $KPV^{-/-}$  mice  
108 ( $1.6 \pm 1.0$  adenomas and  $0.04 \pm 0.02$  adenocarcinomas per  $KPV^{-/-}$  mouse) (**SI Appendix, S2B**).  
109 Together, these data suggest that tumor progression is suppressed by the loss of vimentin in  
110  $KPV^{-/-}$  mice. Immunohistochemistry (IHC) staining for vimentin, TTF-1, and Ki67 was performed  
111 on serial sections of lung tissue from  $KPV^{+/+}$  and  $KPV^{-/-}$  mice at 6 wpi. Vimentin was expressed  
112 in  $KPV^{+/+}$  tumors and normal adjacent lung tissue, but was not expressed in  $KPV^{-/-}$  lung tissue  
113 (**Figure 1D**). TTF-1 is a biomarker associated with lung adenocarcinoma (29).  $KPV^{-/-}$  mice had  
114 fewer TTF-1-positive cells, and clusters of TTF-1-positive cells were smaller than those observed  
115 in  $KPV^{+/+}$  lungs.  $KPV^{+/+}$  and  $KPV^{-/-}$  mice displayed positive Ki67 staining, which was mainly  
116 associated with tumor cells, with no apparent difference in quantity or localization of the dividing  
117 cells as determined by Ki67 staining (**Figure 1E**). Mutant KRAS activates the RAF–MEK–ERK  
118 pathway, which is involved in cancer cell proliferation and survival (30). IHC revealed similar levels  
119 of pERK1/2 staining between  $KPV^{+/+}$  and  $KPV^{-/-}$  mice, suggesting that mutant KRAS expression  
120 was activated in  $KPV^{+/+}$  and  $KPV^{-/-}$  mice (**SI Appendix, S2C**). Because infiltrating immune cells  
121 can serve as tumor suppressors or promoters, we evaluated the presence of immune cells by IHC  
122 staining with an antibody against CD45 (**SI Appendix, S2C**). Strikingly, lung tissue from  $KPV^{-/-}$

123 mice had fewer CD45-positive stained cells than did  $KPV^{+/+}$  mice. Finally, by 12 wpi,  $KPV^{+/+}$  mice  
124 accumulated mutant *Kras* transcripts in the liver while  $KPV^{-/-}$  mice did not, suggesting that  
125 vimentin-expressing cells form metastatic lesions (**Supplemental Figure 1C**). Together, these  
126 data suggest that loss of vimentin suppresses tumor development in this mouse model of lung  
127 adenocarcinoma, which leads to prolonged survival.

128

### 129 ***Transcriptional profiling reveals a less differentiated cancer phenotype in vimentin-null*** 130 ***cancer cells***

131 To better understand how vimentin is involved in the molecular pathways of lung adenocarcinoma,  
132 we used RNA-seq to identify genes that have altered expression in the absence of vimentin. To  
133 this end, epithelial-derived cancer cells (CD45-negative, EpCAM-positive) were isolated from  
134  $KPV^{+/+}$  and  $KPV^{-/-}$  lungs at 6 wpi with Ad-Cre (hereafter referred to as  $KPV^{+/+}$  and  $KPV^{-/-}$  cells).  
135 The absence of vimentin in  $KPV^{-/-}$  cells was confirmed via Western blot and immunofluorescence  
136 staining (**SI Appendix, S1F and G**). We isolated messenger RNA (mRNA) from  $KPV^{+/+}$  and  
137  $KPV^{-/-}$  cells and performed RNA-seq. Samples clustered together via principal component  
138 analysis (PCA) and Pearson's correlation with no outlying data points (**SI Appendix, S3A and**  
139 **B**). A majority of the sample variance (97.6%) could be attributed to the loss of vimentin in  $KPV^{-/-}$   
140 cells (**SI Appendix, S3A**). There were 904 differentially expressed genes (DEGs) between the  
141  $KPV^{+/+}$  and  $KPV^{-/-}$  cells (**SI Appendix, S3C**). Of these, 316 genes were upregulated (Cluster 1)  
142 and 588 genes were downregulated (Cluster 2) in  $KPV^{+/+}$  cells compared to  $KPV^{-/-}$  cells (**Figure**  
143 **2A**). To characterize these genes, we performed Gene Ontology (GO) enrichment. Of note,  
144 epithelial cell differentiation and cell adhesion genes were upregulated in  $KPV^{-/-}$  cells while cell  
145 migration and mesenchymal cell proliferation genes were downregulated in  $KPV^{-/-}$  cells. When  
146 we explored the DEGs that contribute to these pathways, we found that several EMT-associated  
147 genes are upregulated in  $KPV^{+/+}$  cells. These include *Twist1* and *Cdh2*, the gene that codes for  
148 N-cadherin (**Figure 2B**). This finding was confirmed by Western blot, which showed an increase

149 in N-cadherin in  $KPV^{+/+}$  cells compared to  $KPV^{-/-}$  cells (**SI Appendix, 1F**). In contrast, genes  
150 associated with epithelial cell phenotype, including claudins *Cldn2*, *Cldn8*, and *Cldn18*, as well as  
151 the cytokeratins *Krt4*, *Krt20*, and *Krt23*, were upregulated in  $KPV^{-/-}$  cells. These data suggest that  
152  $KPV^{-/-}$  cells retain the phenotype associated with their alveolar epithelial cell origin and fail to  
153 upregulate key mesenchymal genes that confer metastatic potential. Therefore,  $KPV^{-/-}$  cells lack  
154 key mesenchymal features that  $KPV^{+/+}$  cells adopt. Invasion is potentiated by matrix  
155 metalloproteases (MMPs), which break down the basement membrane, allowing cells to move  
156 toward adjacent capillaries. *Mmp11*, *Mmp15*, and *Mmp24* are upregulated in  $KPV^{+/+}$  cells (**Figure**  
157 **2B**). To cross the basement membrane, cells must form invadopodia, a process that relies on  
158 vimentin (15). Accordingly, invadopodia-associated genes (*Arpc2*, *Arpc5*, *Arpc5l*, and *Actr2*) are  
159 downregulated in  $KPV^{-/-}$  cells (**Figure 2B**). Cells must then migrate across a collagen-rich  
160 interstitial space to reach the bloodstream. This process is coordinated by chemokines (*Cxcl12*),  
161 integrins (*Itga5* and *Itgb5*), and alterations in the ECM (*Lama3*, *Lamb3*, *Lamc2*, and *); these  
162 genes are significantly downregulated in  $KPV^{-/-}$  cells compared to  $KPV^{+/+}$  cells (**Figure 2B**).  
163 Together, these results suggest that vimentin is involved in the early cellular events that lead to  
164 metastasis.*

165

### 166 ***An intact vimentin network is required for cancer cell migration and invasion***

167 Based on the observation that cell motility pathways are downregulated in  $KPV^{-/-}$  cells compared  
168 to  $KPV^{+/+}$  cells, we set out to test whether vimentin is required for the cell-intrinsic motility  
169 properties that are necessary for lung cancer cell metastasis.  $KPV^{+/+}$  and  $KPV^{-/-}$  cells were  
170 subjected to several motility assays that mimic the transit patterns a lung cancer cell undergoes  
171 during metastasis. To evaluate migration, a scratch wound healing assay was performed (**Figure**  
172 **3A**). Within 6 hours,  $KPV^{+/+}$  cells had closed the majority of the wound area ( $72.71 \pm 3.267\%$ ). In  
173 contrast,  $KPV^{-/-}$  cells closed only  $17.71 \pm 3.267\%$  of the denuded area. To test the invasive



174 potential of  $KPV^{+/+}$  and  $KPV^{-/-}$  cells, a Matrigel-coated transwell assay was used to mimic invasion  
175 across the alveolar basement membrane.  $KPV^{+/+}$  cells had a 16-fold increased rate of invasion as  
176 compared to  $KPV^{-/-}$  cells (invasive index,  $230 \pm 41.76$  vs.  $14.58 \pm 2.68$ , respectively) (**Figure 3B**).  
177 Three-dimensional invasion was modeled by generating  $KPV^{+/+}$  and  $KPV^{-/-}$  spheroids and  
178 tracking the invasion of cells through collagen gels.  $KPV^{+/+}$  spheroids grew 4.65 times larger than  
179  $KPV^{-/-}$  spheroids, suggesting that, in a three-dimensional model,  $KPV^{-/-}$  cells have impaired  
180 migration and invasion (**Figure 3C**). Given these results, we conclude that vimentin is required  
181 for migration and invasion in this model of lung adenocarcinoma.

182 Withaferin A (WFA) is a steroidal lactone that has been validated as an anticancer agent  
183 in a range of murine tumor models, including breast, prostate, and ovarian cancer (31-33). WFA  
184 causes vimentin aggregation in cells by promoting phosphorylation at serine 38 (Ser38) and  
185 serine 56 (Ser56) (34). We set out to determine whether WFA-mediated disruption of the vimentin  
186 intermediate filament network affects lung adenocarcinoma cell metastasis. To test the hypothesis  
187 that the vimentin intermediate filament network is sufficient for migration and invasion *in vitro*, we  
188 treated  $KPV^{+/+}$  cells and human lung adenocarcinoma (A549) cells with WFA. The vimentin  
189 intermediate filament network, which extends from the nucleus to the plasma membrane, was  
190 retracted from the plasma membrane and collapsed around the nucleus following treatment with  
191 WFA, with no change in vimentin protein expression (**Figure 3D, Supplemental S4A-B**) (35).  
192 WFA treatment decreased  $KPV^{+/+}$  migration in a scratch wound assay by ~46% (**Figure 3F**).  
193 Similarly, cell invasion was completely suppressed following treatment with WFA (**Figure 3G**).  
194 We observed a similar trend in human-derived A549 cells, which exhibited a dose-dependent  
195 decrease in cell migration following treatment with WFA (**SI Appendix, S3C**). These data suggest  
196 that disruption of the vimentin intermediate filament network impairs lung adenocarcinoma cell  
197 motility.

198

199 ***Withaferin A treatment attenuates cancer progression***

200 We set out to determine whether WFA-mediated disruption of the vimentin intermediate filament  
201 network affects lung adenocarcinoma progression. Mice were administered Ad-Cre to initiate  
202 tumor development; at 2 wpi, *KPV<sup>+/+</sup>* mice were administered WFA (4 mg/kg, Q.O.D, p.o.) (**Figure**  
203 **4A**). At 6 wpi, *KPV<sup>+/+</sup>* mice that were given WFA had developed smaller tumors (tumor burden,  
204  $15.65 \pm 2.518\%$ ) than had vehicle-treated mice (tumor burden,  $25.1 \pm 3.842\%$ ) (**Figure 4B**). Lungs  
205 were harvested, fixed, and stained with H&E and immunostained for vimentin, TTF-1, and Ki67.  
206 Vehicle-treated *KPV<sup>+/+</sup>* mice had enhanced TTF-1 and Ki67 staining associated with lung tumors.  
207 In contrast, WFA-treated mice had reduced tumor burden with diminished TTF-1 and Ki67 staining  
208 (**Figure 4C**). Collectively, these data suggest that vimentin can be pharmacologically targeted to  
209 disrupt the ability of lung cancer cells to invade and migrate away from the primary tumor.

210

#### 211 ***Vimentin-null cancer cells accumulate glutathione***

212 Glutathione is an antioxidant that neutralizes reactive oxygen species (ROS) and thus regulates  
213 cellular response to oxidative stress. We identified genes involved in glutathione and serine  
214 metabolic processes that were significantly upregulated in *KPV<sup>-/-</sup>* cells compared to *KPV<sup>+/+</sup>* cells  
215 (**Figure 2A**). Furthermore, genes associated with glycolysis are positively enriched in *KPV<sup>-/-</sup>* cells  
216 while genes associated with oxidative phosphorylation are negatively enriched in *KPV<sup>-/-</sup>* cells (**SI**  
217 **Appendix, S3D**). To better understand how the loss of vimentin leads to changes in the metabolic  
218 landscape, we performed metabolomics analysis on *KPV<sup>+/+</sup>* and *KPV<sup>-/-</sup>* cells. In *KPV<sup>-/-</sup>* cells,  
219 glutathione and several metabolites involved in its production were upregulated compared to  
220 *KPV<sup>+/+</sup>* cells; these other metabolites include serine, glycine, glutamate, glutamine, and  
221 cystathionine (**Figure 5A**). By interrogating our RNA-seq data, we identified significantly  
222 upregulated genes that correspond to an increased production of glutathione in *KPV<sup>-/-</sup>* cells.  
223 These include: *Slc1a5*, a glutamine transporter; *Shmt1*, an enzyme required for metabolism of  
224 serine to glycine; and *Gclm* and *Gclc*, enzymes involved in the conversion of glutamate to  
225 glutathione (**Figure 2A, Figure 5C**). The RNA-seq and metabolomics findings are summarized in

226 **Figure 5D** and show that, compared to  $KPV^{+/+}$  cells,  $KPV^{-/-}$  cells have elevated levels of  
227 metabolites and genes involved in the production of glutathione.

228

### 229 ***Hypoxia-mediated cell migration is dependent on vimentin***

230 Based on the finding that  $KPV^{-/-}$  cells produce higher levels of glutathione than do  $KPV^{+/+}$  cells,  
231 we hypothesized that vimentin is involved in the lung adenocarcinoma response to oxidative  
232 stress. Vimentin is involved in a ROS negative feedback loop: high levels of ROS increase  
233 vimentin expression, and vimentin filaments protect cells from oxidative damage and lead to  
234 decreased production of ROS (36-38). Compared to  $KPV^{+/+}$  cells,  $KPV^{-/-}$  cells produce high levels  
235 of hypoxia-inducible factor 1-alpha (*Hif1a*), the master regulator of the cellular response to  
236 hypoxia (**Figure 5C**). Hypoxia occurs when tumors outgrow their blood supply and the overall  
237 amount of oxygen available for cancer cell respiration decreases (39). Hypoxic environments  
238 cause mitochondria to produce ROS, which can promote EMT and metastasis (40-42). Exposure  
239 to hypoxia *in vitro* does not change overall vimentin protein content of A549 cells (**Figure 6A**).  
240 However, hypoxia impacts the organization of the vimentin intermediate filament network in a  
241 similar manner as WFA treatment (**Figure 6B**). Under normoxic conditions, vimentin filaments  
242 extend from the nucleus to the periphery of the cell. In contrast, hypoxia causes retraction of  
243 vimentin intermediate filaments from the plasma membrane and formation of disassembled  
244 “squiggles” at the cell edge. To test the functional outcomes of this shift in architecture, we  
245 subjected wild-type ( $Vim^{+/+}$ ) and Vimentin knockdown ( $Vim^{KD}$ ) cells to motility assays (**Figure 6C**).  
246 Under hypoxia,  $Vim^{+/+}$  cells have ~1.43 times greater wound closure than under normoxic  
247 conditions.  $Vim^{KD}$  have impaired wound closure under hypoxia compared to normoxia, with a  
248 relative migration rate of 0.73 times their rate under normoxic conditions (**Figure 6D**). Similarly,  
249 the invasive index of  $Vim^{+/+}$  cells is 3.33 times higher under hypoxic conditions compared to  
250 normoxic conditions, an increase that was not observed with  $Vim^{KD}$  cells (**Figure 6E**). For both  
251 migration and invasion assays, hypoxia led to significantly higher rates of motility in  $KPV^{+/+}$  cells

252 compared to *Vim*<sup>KD</sup> cells. Hypoxia activates the PI3K/Akt pathway (43). Accordingly, we observed  
253 an accumulation of phosphorylated Akt (pAkt) over 24 hours of exposure to hypoxia (**Figure 6F**).  
254 However, in the absence of vimentin, pAkt levels decreased (**Figure 6G**). To identify whether  
255 vimentin and pAkt physically interact, we performed immunoprecipitation on vimentin collected  
256 from cells cultured under either normoxia or hypoxia. We found that, under hypoxia, pAkt binds  
257 vimentin (**Figure 6H**). These findings are supported by previous reports that Akt1 activation  
258 mediates cell invasion in soft-tissue sarcoma through its interaction with vimentin (17). Therefore,  
259 we concluded that vimentin is required for hypoxia-mediated cell invasion and migration.

260

### 261 ***Vimentin is required for lung cancer metastasis***

262 The cell-autonomous ability of vimentin-expressing cells to metastasize *in vivo* was assessed  
263 using an allograft tumor model (**Figure 7A**). *Luc-KPV*<sup>+/+</sup> cells, a luciferase expressing  
264 cell line that reproducibly colonizes to the lung following subcutaneous injection (44, 45), were  
265 transfected with CRISPR/Cas9 vimentin knockout plasmid to generate *Luc-KPV*<sup>-/-</sup> cells (**SI**  
266 **Appendix, S5A**). Briefly, nude mice were subcutaneously injected in the right flank with either  
267 *Luc-KPV*<sup>+/+</sup> or *Luc-KPV*<sup>-/-</sup> cells (**Figure 7A**). Flank tumor volume and tumor radiance were  
268 measured weekly; there was no significant difference in either tumor volume or radiance between  
269 *Luc-KPV*<sup>+/+</sup> and *Luc-KPV*<sup>-/-</sup> conditions during weeks 1–3. At week 3, flank tumors were excised  
270 (**Figure 7B, SI Appendix, S4B**).

271 At week 4 after injection, *Luc-KPV*<sup>+/+</sup> cells colonized to the lung in 5 of 5 nude mice,  
272 whereas *KPV*<sup>-/-</sup> cells failed to colonize to the lung in 4 of 5 nude mice (**Figure 7A-B, SI Appendix,**  
273 **S5D-E**). Mice injected with *KPV*<sup>+/+</sup> cells had considerable lung tumor burdens, as assessed by  
274 IVIS imaging and H&E staining (**Figure 7C and E, SI Appendix, S5E**). In contrast, *KPV*<sup>-/-</sup> cells,  
275 on average, failed to form lung tumors. When quantified, the metastatic signal in the lung was  
276 significantly higher in *KPV*<sup>+/+</sup> mice ( $2.45E9 \pm 1.95E9$  photons $\cdot$ cm<sup>-2</sup>sr<sup>-1</sup>sec<sup>-1</sup>) than *KPV*<sup>-/-</sup> mice  
277 ( $3.87E7 \pm 6.90E7$  photons $\cdot$ cm<sup>-2</sup>sr<sup>-1</sup>sec<sup>-1</sup>). Flank tumors that were removed at week 3 after

278 injection were stained with H&E and immunostained for vimentin (**Figure 7D**).  $KPV^{+/+}$  cells formed  
279 dense tumors that displayed uniform vimentin expression.  $KPV^{-/-}$  cells also formed dense tumors;  
280 surprisingly, some cells within the tumor expressed vimentin. Based on their spindly or round  
281 shapes, we inferred that these cells were infiltrating fibroblasts or macrophages, two cell types  
282 which canonically express vimentin. The lungs of  $KPV^{+/+}$ -injected mice displayed large, vimentin-  
283 positive metastatic lesions (**Figure 7E**). In contrast, the few metastatic tumors that formed in the  
284 lungs with  $KPV^{-/-}$  cells were sparse and small; as expected, these tumors did not express  
285 vimentin. Therefore, we conclude that vimentin is required for the rapid metastatic spread of  
286 murine lung adenocarcinoma cells. Furthermore, this effect is cell-autonomous. By injecting  
287  $KPV^{+/+}$  and  $KPV^{-/-}$  cells into mice that have normal, vimentin-expressing stromal cells, we show  
288 that vimentin-expressing cells in the tumor microenvironment are not sufficient to promote the  
289 metastatic spread of vimentin-null cancer cells.

290

## 291 **Discussion**

292 Clinically, vimentin expression correlates with increased metastatic potential (24), high  
293 nuclear grade (46), and poor overall survival across most solid tumor types including lung,  
294 prostate, and breast cancers (6-8). Vimentin has also been implicated in many aspects of cancer  
295 initiation and progression, including tumorigenesis, EMT, and the metastatic spread of cancer (9).  
296 Many of these reports relied on *in vitro* experiments comparing cultured cells derived from WT  
297 and  $Vim^{-/-}$  mice. Our data provides causal evidence that vimentin is required for the metastasis  
298 of *Kras*-mutant, *Tp53*-null lung cancer cells *in vivo*. Data from the  $KPV^{-/-}$  GEMM show that  
299 vimentin is required for metastasis and tumor progression (**Figures 1 and 7**), as  $KPV^{-/-}$  mice had  
300 decreased lung tumor burden, lower grade tumors, and no metastasis from primary tumors in the  
301 flank to the lung (**Figures 1C-D and 7A-C**). Consistent with the decreased metastatic rates, we  
302 observed a survival advantage in the  $KPV^{-/-}$  mice (**Figure 1B**). These results were recapitulated  
303 in  $KPV^{+/+}$  mice by disrupting vimentin filaments with withaferin A treatment two weeks post tumor

304 initiation (**Figure 4**). Collectively, these data provide evidence that vimentin is integral in the  
305 progression and metastasis of lung cancer.

306 The epithelial-to-mesenchymal transition (EMT) is the canonical mechanism by which  
307 cancer cells lose their epithelial morphology, form invadopodia and degrade the surrounding  
308 basement membrane to promote the invasive spread of cancer (9, 15). Several studies support  
309 the notion that vimentin functions as a positive regulator of EMT and that the upregulation of  
310 vimentin expression in epithelial cells is a prerequisite for EMT induction in malignant tumors (9,  
311 13, 47-49). In this respect, it has been proposed that vimentin intermediate filaments provide a  
312 scaffold for the recruitment of transcription factors, such as Slug and Twist. Specifically, vimentin  
313 interacts with Slug to recruit ERK, which promotes the phosphorylation of Slug that is required for  
314 the initiation of the EMT (13). Similarly, when transforming growth factor  $\beta$  is used to activate the  
315 Smad-mediated EMT in primary alveolar epithelial cells, the shape changes characteristic of the  
316 EMT are directly associated with a rapid induction of vimentin expression regulated by a Smad-  
317 binding-element located in the 5' promotor region of the *Vim* gene (14). Presently, we used RNA-  
318 seq to show that *KPV*<sup>-/-</sup> cells derived from primary lung tumors display a distinct transcriptional  
319 phenotype, which is characterized by the suppression of genes directly involved in EMT, invasion  
320 and migration (**Figure 2**).

321 To invade into the surrounding tissue, an invasive tumor cell will first form invadopodia  
322 and degrade the surrounding basement membrane; vimentin is required for invadopodia  
323 formation (15). We showed that *KPV*<sup>-/-</sup> cells fail to invade the surrounding extracellular matrix  
324 using a 3-dimensional experimental approach (**Figure 3B-C**). We previously reported that the  
325 transient expression of vimentin in epithelial cells, which typically express type I and type II keratin  
326 intermediate filaments causes epithelial cells to be transformed into mesenchymal cells, which is  
327 accompanied by changes in cell shape, increased cell motility and focal adhesion dynamics (11,  
328 14). Direct evidence supporting the role of vimentin in the migration of *Kras*-mutant, *Tp53*-null  
329 lung cancer cells was demonstrated when vimentin expression was disrupted genetically (e.g.

330 *KPV*<sup>-/-</sup> cells and *Vim*<sup>KD</sup>) and pharmacologically (WFA) resulting in impaired migration.  
331 Importantly, *KPV*<sup>-/-</sup> cells implanted in the flank of nude mice also failed to invade and migrate  
332 away from the primary tumor (**Figure 7**).

333 WFA and hypoxia treatment modulate cell motility of *Kras*-mutant, *Tp53*-null lung cancer  
334 cells in a vimentin-dependent manner. Cell motility decreases following WFA treatment and  
335 increases following hypoxia exposure, despite the seemingly similar effect WFA and hypoxia have  
336 on vimentin filament architecture (**Figure 3D and 6D**). These differences are likely due to vimentin  
337 phosphorylation, which regulates processes underlying cell motility in normal and cancer cells  
338 (50). WFA results in phosphorylation at Ser55/56 and hyperphosphorylation at Ser38/39 (51, 52).  
339 At Ser38/39, phosphorylation confers protection of the vimentin filament from caspase cleavage,  
340 while phosphorylation at Ser55/56 increases vimentin degradation which decreases the cell's  
341 ability to invade and spread. On the other hand, hypoxia activates Akt, which binds to the head  
342 region of vimentin, resulting in the phosphorylation of vimentin at Ser38/39 (17). This interaction  
343 leads to hypoxia-mediated increases in cancer cell motility *in vitro*, as well as tumor and  
344 metastasis growth *in vivo*. Furthermore, Akt1 phosphorylation of vimentin offers a level of  
345 protection against caspase-mediated proteolysis, which allows for retention of mature vimentin  
346 filaments that can further contribute to cell motility (17).

347 We found that loss of vimentin alters the metabolic phenotype of *Kras*-mutant, *Tp53*-null  
348 lung cancer cells (**Figure 5**). Our data shows that *KPV*<sup>-/-</sup> cells accumulate high levels of  
349 glutathione, which we hypothesize is due to an elevated response to oxidative stress. This is in  
350 line with a previous finding that vimentin-null cells produce higher levels of ROS compared to  
351 wildtype cells (53). Additionally, treatment with WFA induces ROS production in epithelial-derived  
352 cancer cells, suggesting that disruption of the vimentin intermediate filament network increases  
353 ROS generation (54). Furthermore, vimentin cooperates with ROS in production of collagen and  
354 cell alignment, functions that are necessary for directional cell motility (55). To that end, ROS-  
355 mediated vimentin reorganization, as shown in **Figure 6B**, allows for increased contraction, which

356 could contribute to the force generation required for efficient migration and invasion (56). In  
357 cancers harboring a mutant *Kras* oncogene, mitochondrial production of ROS is required for tumor  
358 growth (57). Through a Rac1-mediated interaction with the mitochondria, phosphorylation of  
359 vimentin at Ser55/56 can mediate mitochondrial motility, leading to a decrease in mitochondrial  
360 membrane potential and vimentin-mediated protection of mitochondria from ROS (58-60). In  
361 vimentin-null cells, which have diminished mitochondrial function, a dysregulated oxidative stress  
362 response might account for the decreased tumor burden observed in *KPV<sup>-/-</sup>* compared to *KPV<sup>+/+</sup>*  
363 lungs. Additionally, we observed that genes associated with the OXPHOS hallmark gene set are  
364 negatively enriched in *KPV<sup>-/-</sup>* cells compared to *KPV<sup>+/+</sup>* cells (**SI Appendix, S3D**). We therefore  
365 reason that the possibly altered mitochondrial function in *KPV<sup>-/-</sup>* cells is reflected in reduced  
366 OXPHOS. *KPV<sup>-/-</sup>* may then rely on glycolysis for ATP production. Accordingly, we found that the  
367 glycolysis hallmark gene set was positively enriched in *KPV<sup>-/-</sup>* cells (**SI Appendix, S3D**).  
368 Furthermore, in lung adenocarcinoma tissue, both oxidative phosphorylation (OXPHOS) and  
369 glycolysis are upregulated compared to normal adjacent lung tissue, suggesting that both  
370 pathways are associated with the disease (61). Together, these data suggest further exploration  
371 of the role of vimentin in cancer metabolism.

372 In the *Kras*-mutant, *Tp53*-null model of lung cancer, global vimentin depletion confers a  
373 survival advantage. Additionally, by treating *KPV<sup>+/+</sup>* mice with WFA following tumor development,  
374 we show that the delayed tumor growth and metastasis observed in *KPV<sup>-/-</sup>* mice in **Figure 1** is  
375 not due solely to delayed onset of tumor growth, but rather to attenuated growth kinetics in tumor  
376 cells that lack an intact vimentin network. Although vimentin-null mice were first reported to display  
377 no obvious phenotype, these data and others suggest that loss of vimentin is protective against  
378 a range of challenges including lung cancer, lipopolysaccharides, bleomycin, asbestos, bacterial  
379 meningitis, cerebral ischemia, and acute colitis (26, 38, 62-64). While this study adds to the body  
380 of knowledge on the phenotype of the vimentin-null mouse, the global knockout model presents  
381 limitations. Namely, in addition to lacking vimentin in cancer cells, *KPV<sup>-/-</sup>* mice have vimentin-null



382 stromal and immune compartments. Because vimentin is canonically expressed in mesenchymal,  
383 hematopoietic, and endothelial cells, which make up a large population of the tumor  
384 microenvironment (TME), loss of vimentin in these cells likely contributes to the decreased tumor  
385 burden in *KPV<sup>-/-</sup>* mice compared to *KPV<sup>+/+</sup>* mice (**Figure 1**). To ensure that vimentin is sufficient  
386 in cancer cells to promote metastasis, we injected *KPV<sup>+/+</sup>* or *KPV<sup>-/-</sup>* cells into wildtype nude mice,  
387 which lack T cells but retain innate immune cells. We observed recruited mesenchymal and  
388 immune cells in subcutaneous flank tumors (**Figure 7D**), suggesting that the vimentin-positive  
389 TME in this model participates in growth of the primary tumor. Despite being in the presence of  
390 vimentin-expressing stromal and immune cells, *KPV<sup>-/-</sup>* cells failed to metastasize. Therefore,  
391 while other groups have found that vimentin deficiency impairs function in cancer-associated  
392 fibroblasts and immune cells such as macrophages and T cells (49, 62, 65, 66), a vimentin-  
393 expressing microenvironment is not sufficient to promote metastasis in the time frame evaluated.  
394 However, more research is needed to fully understand how vimentin in non-cancer cells may be  
395 synergistically controlling metastasis. Our group has previously shown that vimentin is required  
396 for the production of mature interleukin 1 $\beta$  (IL-1 $\beta$ ), a mediator of cancer growth and metastasis  
397 (62, 67). The cytokine IL-1 $\beta$  further promotes tumor-associated macrophage infiltration, which  
398 could explain the decreased recruitment of CD45+ cells in *KPV<sup>-/-</sup>* tumors compared to *KPV<sup>+/+</sup>*  
399 tumors (**SI Appendix, S2C**) (68). To better understand how vimentin participates in different  
400 compartments of the TME, we recognize that animal models with immune-, mesenchymal-, and  
401 epithelial-specific deletion of vimentin will need to be created.

402 This work gives physiological context to a large range of clinical data that links vimentin to  
403 cancer progression (6, 24, 69). There is also a wealth of *in vitro* research that provide a number  
404 of vimentin-dependent mechanisms related to cancer metastasis. Broadly, these mechanisms  
405 include interacting with actin to form lamellipodia and invadopodia, stabilization of collagen  
406 mRNA, guiding microtubules to control cell polarity, and aligning actin-potentiated traction forces

407 (15, 16, 70-73). Ultimately, our findings provide *in vivo* context for a multitude of clinical and *in*  
408 *vitro* reports by showing that vimentin is required for lung cancer metastasis. Through genetic and  
409 chemical interference, we have identified vimentin as a potential clinical target for metastatic lung  
410 cancer.

411 **Materials and Methods**

412 **Murine lung cancer model.** All animal experiments were approved by Northwestern University's  
413 Institutional Animal Care and Use Committee (IACUC). Sex-matched 6–10-week-old mice were  
414 used for all *in vivo* experiments. *LSL-Kras<sup>G12D/+</sup>;Tp53<sup>flox/flox</sup>* (*KPV<sup>+/+</sup>*) mice were bred as described  
415 by DuPage and colleagues and were generously gifted to us by Dr. Navdeep Chandel  
416 (Northwestern University, Chicago, IL) (25). Vimentin-knockout mice were a gift from Albee  
417 Messing (University of Wisconsin, Madison, WI). Vimentin-knockout mice were crossed with  
418 *KPV<sup>+/+</sup>* mice to create *KPV<sup>-/-</sup>* mice. *KPV<sup>+/+</sup>*, *KPV<sup>-/-</sup>*, and the validated *Rosa26-LSL-LacZ* mice  
419 were administered adenovirus expressing Cre recombinase (Ad-Cre; ViraQuest) or a null  
420 adenovirus (Ad-Null) via intratracheal instillation ( $1 \times 10^9$  pfu unless otherwise noted) under  
421 isoflurane anesthesia (28). Survival was monitored daily. Weight was monitored weekly.

422

423 **Magnetic resonance imaging.** Scheduled magnetic resonance imaging (MRI) was performed at  
424 Northwestern University Center for Translational Imaging (Chicago, IL) via a 7-tesla system  
425 (Clinscan, Bruker) using a four-channel mouse body coil at set time points (2, 6, and 10 weeks  
426 after Ad-Cre administration). In order to permit tolerance to imaging, the mice were anesthetized  
427 with isoflurane (2% isoflurane in oxygen for induction, followed by 1.5–2% via nose cone for  
428 maintenance during imaging). Pulse oximetry and respiration were recorded and used to trigger  
429 the MRI in order to avoid motion artifacts. Turbo Multi Spin Echo imaging sequence was used in  
430 conjunction with respiratory triggering to acquire *in vivo* MRI coronal images covering all the lung  
431 area and portions of abdomen, including liver and kidneys (ST = 0.5 mm, In plane = 120  $\mu$ m, TR  
432 =1000 msec, TE= 20 msec). Gradient Echo sequence was used with cardiac triggering (using  
433 pulse oximeter rate) covering the lung area transversally (ST = 0.5 mm, In plane = 120  $\mu$ m, TR  
434 ~20 msec, TE ~ 2 msec). Jim software was used to quantify tumor burden (Xinapse).

435

436 **Immunohistochemistry.** Mice were anesthetized and lungs were perfused via the right ventricle  
437 with 4% paraformaldehyde in phosphate-buffered saline (PBS). A 20-gauge angiocatheter was  
438 sutured into the trachea, heart and lungs were removed en bloc, and then lungs were inflated with  
439 0.8 mL of 4% paraformaldehyde at a pressure not exceeding 16 cm H<sub>2</sub>O. Tissue was fixed in 4%  
440 paraformaldehyde in PBS overnight at 4°C, then processed, embedded in paraffin, and sectioned  
441 (4–5 µm). Tissue sections were stained with hematoxylin and eosin (H&E) or used for  
442 immunohistochemistry. After rehydration, tissues were subjected to antigen retrieval in 10 mM  
443 sodium citrate (pH = 6.0) with 0.05% Tween-20 for 20 minutes at 96–98°C, followed by 20 minutes  
444 of cooling. Tissue sections were blocked in 3% hydrogen peroxide for 5 min, then a Vector  
445 Laboratories avidin/biotin blocking kit (SP-2001), Vectastain ABC kit (PK-4001), and 3,3'-  
446 diaminobenzidine (DAB) peroxidase substrate kit (SK-4100) were used according to the  
447 manufacturer's protocols. Nuclei were counterstained with hematoxylin (Thermo Scientific 72604)  
448 and treated with bluing solution (Thermo Scientific 7301), and then coverslips were mounted with  
449 Cytoseal 60 (Thermo Scientific 8310-4). A TissueGnostics automated slide imaging system was  
450 used to acquire whole-tissue images and measure area.

451  
452 **Cell isolation and culture.** *KPV<sup>+/+</sup>* and *KPV<sup>-/-</sup>* mice were treated with Ad-Cre as described above;  
453 after 6 weeks, mice were sacrificed and lung tumors were excised. Tissue was dissociated into a  
454 single cell suspension in 0.2 mg/mL DNase and 2 mg/mL collagenase D and was filtered through  
455 a 40 µm filter. Cells then underwent two rounds of selection. First, cells were treated with anti-  
456 CD45 magnetic beads (Miltenyi Biotec, 130-052-301) and were passed through a magnetic  
457 column. CD45-negative cells were then subjected to anti-EPCAM magnetic beads (Miltenyi  
458 Biotec, 130-105-958) and underwent positive selection. CD45-negative, EPCAM-positive cells  
459 were expanded *in vitro* and were used in experiments between passages 1 and 10. Cells derived  
460 from a human lung adenocarcinoma (A549, CCL-185) were obtained from the American Type  
461 Culture Collection (ATCC, Manassas, VA). All cells were maintained in Dulbecco's modified Eagle

462 medium (DMEM) supplemented with 10% fetal bovine serum, 100 U/mL penicillin, 100 µg/mL  
463 streptomycin, and HEPES buffer. All cells were grown in a humidified incubator of 5% CO<sub>2</sub>/95%  
464 air at 37°C (unless otherwise noted).

465

466 **Polymerase chain reaction.** Mice were infected with Ad-Null or Ad-Cre; at 2, 8, and 12 wpi, mice  
467 were sacrificed and lungs were harvested. Lungs were lysed, and DNA was extracted and  
468 amplified by polymerase chain reaction (PCR) using the following primers: *Kras* forward, GGC  
469 CTG CTG AAA ATG ACT GAG TAT A; *Kras* reverse, CTG TAT CGT CAA GGC GCT CTT; *Kras-*  
470 *G12D* forward, CTTGTGGTGGTTGGAGCTGA; and *Kras-G12D* reverse,  
471 TCCAAGAGACAGGTTTCTCCA. DNA products were run on an agarose gel and imaged with the  
472 Li-Cor Odyssey imaging system.

473

474 **Western blotting.** Western blot analysis was utilized to quantify protein levels in cell lysates. The  
475 protein was separated using 12% sodium dodecyl sulfate polyacrylamide gel electrophoresis  
476 (SDS-PAGE) and transferred onto nitrocellulose membranes. Membranes were then blocked with  
477 Odyssey blocking buffer (Li-Cor Biosciences) and subsequently incubated with the appropriate  
478 primary antibodies overnight at 4°C. IRDye secondary antibodies were then used (Li-Cor  
479 Biosciences, 1:10,000) for 2 hours at room temperature. Images of blots were acquired using the  
480 Li-Cor Odyssey Fc Imaging System.

481

482 **RNA-sequencing.** Tumor cells were isolated from *KPV<sup>+/+</sup>* and *KPV<sup>-/-</sup>* mice at 6 wpi and  
483 underwent CD45-negative, EpCAM-positive magnetic-activated cell sorting (MACS) selection as  
484 described above. Cells were cultured for one passage, then lysed using RLT lysis buffer (Qiagen),  
485 and total RNA was isolated with the RNeasy Plus Mini Kit (Qiagen). Quality of RNA was confirmed  
486 with a TapeStation 4200 (Agilent); all samples had an RNA integrity number (RIN) score equal to  
487 or greater than 9.8. Next, mRNA was isolated via poly(A) enrichment (NEBNext). Libraries were

488 prepared using NEBNext RNA Ultra chemistry (New England Biolabs). Sequencing was  
489 performed on an Illumina NextSeq 500 using a 75-cycle single-end high-output sequencing kit.  
490 Reads were demultiplexed (bcl2fastq), and fastq files were aligned to the mm10 mouse reference  
491 genome with TopHat2. Htseq was used to obtain counts. The resulting data were filtered, and  
492 differentially expressed genes (DEGs) were identified using the edgeR package. DEGs were  
493 selected using a false discovery rate (FDR) cutoff of <0.05, with a 1.0-fold change cutoff for  
494 pairwise comparison. K-means clustering and heat map visualization was performed using the  
495 Morpheus web tool (<https://software.broadinstitute.org/morpheus>). Enrichment analysis was  
496 performed using Gorilla (74, 75).

497

498 **Withaferin A treatments.** Withaferin A (WFA) was purchased from Enzo Life Sciences and  
499 dissolved in dimethyl sulfoxide (DMSO; Sigma-Aldrich) to a final concentration of 5  $\mu$ M unless  
500 noted otherwise. For *in vivo* experiments, jelly pellets were utilized to provide an oral, voluntary  
501 method of drug delivery. Using a 24-well flat-bottom tissue culture plate as the jelly mold, WFA (4  
502 mg/kg in DMSO) or vehicle control (DMSO only) were combined with gelatin and Splenda for  
503 flavoring as described elsewhere (76). Tumor development was induced with Ad-Cre as described  
504 above. Two weeks following Ad-Cre administration, mice were fed jelly pellets every other day for  
505 4 weeks. Survival was tracked daily and weight was measured weekly.

506

507 **Scratch wound assay.** Cells were grown to 100% confluence in 6-well plates. A pipette tip was  
508 used to make a single scratch in the monolayer. The cells were washed with 1 $\times$  PBS to remove  
509 debris and imaged at 0 hours and 6 hours. For WFA conditions, WFA or DMSO was added at 0  
510 hours (when the scratch was created). Rate of cell migration was calculated using ImageJ  
511 software. Results were normalized to the initial wound area at 0 hours.

512

513 **Matrigel invasion assay.** Transwell inserts with 8  $\mu\text{m}$  pores were coated with Matrigel (200  
514  $\mu\text{g/mL}$ ), and  $5 \times 10^4$  *KPV<sup>+/+</sup>* or *KPV<sup>-/-</sup>* cells were seeded atop each transwell in serum-free media.  
515 For all experiments with A549 cells, the cells were serum-starved for 24 hours and were then  
516 plated at a concentration of  $1 \times 10^5$  cells per transwell. For WFA experiments, cells were  
517 resuspended in WFA or DMSO containing media directly before being seeded in transwells.  
518 Media containing 10% fetal bovine serum was added to the bottom well to serve as a  
519 chemoattractant. Cells were placed at 37°C for 48 hours (24 hours for A549 cells). Following  
520 incubation, the Matrigel with the cells remaining on the upper surface of the transwell was  
521 removed with a cotton swab. The cells remaining on the bottom of the membrane were fixed in  
522 2% paraformaldehyde and incubated with Hoechst nuclear dye (Invitrogen; 1:10,000 in 1× PBS).  
523 Five random 10× magnification fields were imaged, and the average number of cells per field was  
524 quantified; this average is reported as the “invasive index.”

525

526 **Spheroid culture.** Spheroids were generated as described by Gilbert-Ross et al. (77). Briefly,  
527 cells were grown in Nunclon Sphera 96-well plates (Thermo-Fisher Scientific) at a concentration  
528 of 3000 cells per well. After 3 days in culture, cells were transferred using a wide-bore pipette tip  
529 to 2 mg/mL collagen (Corning) in 4-well LabTek plates (Nunc). Collagen was allowed to gel at  
530 37°C for 1 hour; then, complete media was added to the spheroids. Gels were imaged using a  
531 Ti2 widefield microscope (Nikon) at 0, 24, and 48 hours. Spheroid area was quantified using Fiji  
532 software. Reported spheroid area values are normalized to 0-hour spheroid area of the same  
533 spheroid.

534

535 **Hypoxia conditions.** A hypoxic environment was created *in vitro* by culturing cells in 1.5% O<sub>2</sub>,  
536 93.5% N<sub>2</sub>, and 5% CO<sub>2</sub> in a humidified variable aerobic workstation (InVivo O<sub>2</sub>; BioTrace

537 International, Muncie, IN). Before experimentation, cell culture medium was allowed to equilibrate  
538 to oxygen levels overnight.

539

540 **Metabolomics.** *KPV<sup>+/+</sup>* and *KPV<sup>-/-</sup>* cells were grown in 6-well plates. High-performance liquid  
541 chromatography (HPLC) grade methanol (80% in water) was added to cells, and plates were  
542 incubated at  $-80^{\circ}\text{C}$  for 20 minutes. Lysates were collected and centrifuged, and the supernatant  
543 was collected and analyzed by High-Performance Liquid Chromatography and High-Resolution  
544 Mass Spectrometry and Tandem Mass Spectrometry (HPLC-MS/MS). Specifically, system  
545 consisted of a Thermo Q-Exactive in line with an electrospray source and an Ultimate3000  
546 (Thermo) series HPLC consisting of a binary pump, degasser, and auto-sampler outfitted with a  
547 Xbridge Amide column (Waters; dimensions of 4.6 mm  $\times$  100 mm and a 3.5  $\mu\text{m}$  particle size). The  
548 mobile phase A contained 95% (vol/vol) water, 5% (vol/vol) acetonitrile, 20 mM ammonium  
549 hydroxide, 20 mM ammonium acetate, pH = 9.0; B was 100% Acetonitrile. The gradient was as  
550 following: 0 min, 15% A; 2.5 min, 30% A; 7 min, 43% A; 16 min, 62% A; 16.1-18 min, 75% A; 18-  
551 25 min, 15% A with a flow rate of 400  $\mu\text{L}/\text{min}$ . The capillary of the ESI source was set to 275  $^{\circ}\text{C}$ ,  
552 with sheath gas at 45 arbitrary units, auxiliary gas at 5 arbitrary units and the spray voltage at 4.0  
553 kV. In positive/negative polarity switching mode, an  $m/z$  scan range from 70 to 850 was chosen  
554 and MS1 data was collected at a resolution of 70,000. The automatic gain control (AGC) target  
555 was set at  $1 \times 10^6$  and the maximum injection time was 200 ms. The top 5 precursor ions were  
556 subsequently fragmented, in a data-dependent manner, using the higher energy collisional  
557 dissociation (HCD) cell set to 30% normalized collision energy in MS2 at a resolution power of  
558 17,500. Besides matching  $m/z$ , metabolites are identified by matching either retention time with  
559 analytical standards and/or MS2 fragmentation pattern. Data acquisition and analysis were  
560 carried out by Xcalibur 4.1 software and Tracefinder 4.1 software, respectively (both from Thermo  
561 Fisher Scientific). For each sample, peak area of each metabolite was normalized to total ion



562 count per sample. Data were log-transformed and compared with a two-tailed, unpaired t-test.

563 Data was analyzed with MetaboAnalyst software (78).

564

565 **Preparation of cells for subcutaneous flank injection.** *KPV<sup>+/+</sup>* cells labeled with luciferase (*Luc-*

566 *KPV<sup>+/+</sup>* cells) were a generous gift from Dr. Navdeep Chandel. To create *Luc-KPV<sup>-/-</sup>* cells, *Luc-*

567 *KPV<sup>+/+</sup>* cells were transfected with a commercially available CRISPR/Cas9 vimentin knockout

568 plasmid according to manufacturer's directions (Santa Cruz Biotechnology sc-423676).

569

570 **Tracking of tumor growth in subcutaneous flank injection model.** Male nude (NU/J) mice

571 were purchased from Jackson Laboratories; 8–12-week-old mice were anesthetized with 2%

572 isoflurane in oxygen and were given a subcutaneous injection of cells ( $1 \times 10^6$  cells in 100  $\mu$ L of

573  $1 \times$  PBS) on their right flanks. Weight and tumor volume were monitored weekly. For IVIS imaging,

574 mice were injected with 150 mg of D-luciferin per kilogram of body weight (PerkinElmer 770504).

575 After 10 minutes, IVIS images were captured. At week 3 post-injection, tumors were removed.

576 Briefly, mice were anesthetized with ketamine (100 mg/kg body weight) and xylazine (10 mg/kg

577 body weight). Tumor area was disinfected with 70% ethanol and iodide solution. Tumors were

578 excised and placed in 4% paraformaldehyde for immunohistochemistry. Wounds were closed with

579 simple interrupted nylon sutures (Ethilon). Mice were monitored until they recovered from

580 anesthesia; they were then housed singly and treated with Meloxicam as an analgesic. The

581 following week, mice underwent a final IVIS imaging session and were then sacrificed.

582

583 **Immunofluorescence confocal microscopy.** For all immunofluorescent immunocytochemistry

584 experiments, cells were grown on no. 1 glass coverslips. Following treatment, *KPV<sup>+/+</sup>* and *KPV<sup>-/-</sup>*

585 cells were fixed in methanol for 3–5 minutes. A549 cells were fixed with 2% paraformaldehyde for

586 7–10 minutes. *KPV<sup>+/+</sup>* and *KPV<sup>-/-</sup>* cells were blocked in 5% normal goat serum (NGS) for 1 hour

587 at room temperature. A549 cells were blocked with 1.5% NGS for 30 minutes at 37°C. Cells were

588 then treated with the indicated primary antibodies overnight at 4°C. Cells were washed twice in  
589 PBS with 0.10% Tween-20 for 3 minutes each and treated with secondary antibodies conjugated  
590 with Alexa Fluor 488 (Invitrogen A-11039, 1:200) and/or Alexa Fluor 568 (Invitrogen A-11004,  
591 1:200), as well as Hoechst nuclear dye (Invitrogen H3570, 1:10,000). Coverslips were mounted  
592 and sealed. A Nikon A1R+ laser scanning confocal microscope equipped with a 60× and 100×  
593 objective lens was used to acquire images. For experiments with A549 cells, a Zeiss LSM 510  
594 laser scanning confocal microscope equipped with a 63× objective lens was used to acquire  
595 images. Nikon NIS-Elements software and ImageJ were used for image processing.

596

597 **Reagents.** All antibodies used are summarized in **Supplemental Table 1**.

598

599 **Acknowledgments:**

600 Histology services were provided by the Northwestern University Mouse Histology and  
601 Phenotyping Laboratory which is supported by NCI P30-CA060553 awarded to the Robert H Lurie  
602 Comprehensive Cancer Center. Imaging work was performed at the Northwestern University  
603 Center for Advanced Microscopy generously supported by NCI CCSG P30 CA060553 awarded  
604 to the Robert H Lurie Comprehensive Cancer Center. Metabolomics services were performed by  
605 the Metabolomics Core Facility at Robert H. Lurie Comprehensive Cancer Center of Northwestern  
606 University. We would like to thank Hiam Abdala-Valencia for performing RNA-sequencing. All  
607 graphic design was created with BioRender.com.

608

609

- 610 1. Siegel RL, Miller KD, Jemal A. Cancer statistics, 2019. *CA Cancer J Clin.* 2019;69(1):7-34.  
611 Epub 2019/01/09. doi: 10.3322/caac.21551. PubMed PMID: 30620402.
- 612 2. Shajani-Yi Z, de Abreu FB, Peterson JD, Tsongalis GJ. Frequency of Somatic TP53  
613 Mutations in Combination with Known Pathogenic Mutations in Colon Adenocarcinoma, Non-  
614 Small Cell Lung Carcinoma, and Gliomas as Identified by Next-Generation Sequencing.  
615 *Neoplasia.* 2018;20(3):256-62. Epub 2018/02/18. doi: 10.1016/j.neo.2017.12.005. PubMed  
616 PMID: 29454261; PMCID: PMC5849803.
- 617 3. Scoccianti C, Vesin A, Martel G, Olivier M, Brambilla E, Timsit JF, Tavecchio L, Brambilla  
618 C, Field JK, Hainaut P, European Early Lung Cancer C. Prognostic value of TP53, KRAS and EGFR  
619 mutations in nonsmall cell lung cancer: the EUELC cohort. *Eur Respir J.* 2012;40(1):177-84. Epub  
620 2012/01/24. doi: 10.1183/09031936.00097311. PubMed PMID: 22267755.
- 621 4. Cox AD, Fesik SW, Kimmelman AC, Luo J, Der CJ. Drugging the undruggable RAS: Mission  
622 possible? *Nat Rev Drug Discov.* 2014;13(11):828-51. Epub 2014/10/18. doi: 10.1038/nrd4389.  
623 PubMed PMID: 25323927; PMCID: PMC4355017.
- 624 5. Cancer Genome Atlas Research N. Comprehensive molecular profiling of lung  
625 adenocarcinoma. *Nature.* 2014;511(7511):543-50. Epub 2014/08/01. doi:  
626 10.1038/nature13385. PubMed PMID: 25079552; PMCID: PMC4231481.
- 627 6. Dauphin M, Barbe C, Lemaire S, Nawrocki-Raby B, Lagonotte E, Delepine G, Birembaut P,  
628 Gilles C, Polette M. Vimentin expression predicts the occurrence of metastases in non small cell  
629 lung carcinomas. *Lung Cancer.* 2013;81(1):117-22. Epub 2013/04/09. doi:  
630 10.1016/j.lungcan.2013.03.011. PubMed PMID: 23562674.
- 631 7. Burch TC, Watson MT, Nyalwidhe JO. Variable metastatic potentials correlate with  
632 differential plectin and vimentin expression in syngeneic androgen independent prostate  
633 cancer cells. *PLoS One.* 2013;8(5):e65005. doi: 10.1371/journal.pone.0065005. PubMed PMID:  
634 23717685; PMCID: PMC3661497.
- 635 8. Domagala W, Lasota J, Dukowicz A, Markiewski M, Striker G, Weber K, Osborn M.  
636 Vimentin expression appears to be associated with poor prognosis in node-negative ductal NOS  
637 breast carcinomas. *Am J Pathol.* 1990;137(6):1299-304. PubMed PMID: 1701960; PMCID:  
638 PMC1877729.
- 639 9. Kidd ME, Shumaker DK, Ridge KM. The role of vimentin intermediate filaments in the  
640 progression of lung cancer. *Am J Respir Cell Mol Biol.* 2014;50(1):1-6. Epub 2013/08/29. doi:  
641 10.1165/rcmb.2013-0314TR. PubMed PMID: 23980547; PMCID: PMC3930939.
- 642 10. Dongre A, Weinberg RA. New insights into the mechanisms of epithelial-mesenchymal  
643 transition and implications for cancer. *Nat Rev Mol Cell Biol.* 2019;20(2):69-84. Epub  
644 2018/11/22. doi: 10.1038/s41580-018-0080-4. PubMed PMID: 30459476.
- 645 11. Mendez MG, Kojima S, Goldman RD. Vimentin induces changes in cell shape, motility,  
646 and adhesion during the epithelial to mesenchymal transition. *FASEB J.* 2010;24(6):1838-51.  
647 Epub 2010/01/26. doi: 10.1096/fj.09-151639. PubMed PMID: 20097873; PMCID: PMC2874471.
- 648 12. Meng J, Chen S, Han JX, Qian B, Wang XR, Zhong WL, Qin Y, Zhang H, Gao WF, Lei YY,  
649 Yang W, Yang L, Zhang C, Liu HJ, Liu YR, Zhou HG, Sun T, Yang C. Twist1 Regulates Vimentin  
650 through Cul2 Circular RNA to Promote EMT in Hepatocellular Carcinoma. *Cancer Res.*  
651 2018;78(15):4150-62. Epub 2018/05/31. doi: 10.1158/0008-5472.CAN-17-3009. PubMed PMID:  
652 29844124.

- 653 13. Virtakoivu R, Mai A, Mattila E, De Franceschi N, Imanishi SY, Corthals G, Kaukonen R,  
654 Saari M, Cheng F, Torvaldson E, Kosma VM, Mannermaa A, Muharram G, Gilles C, Eriksson J,  
655 Soini Y, Lorens JB, Ivaska J. Vimentin-ERK Signaling Uncouples Slug Gene Regulatory Function.  
656 *Cancer Res.* 2015;75(11):2349-62. Epub 2015/04/10. doi: 10.1158/0008-5472.CAN-14-2842.  
657 PubMed PMID: 25855378.
- 658 14. Rogel MR, Soni PN, Troken JR, Sitikov A, Trejo HE, Ridge KM. Vimentin is sufficient and  
659 required for wound repair and remodeling in alveolar epithelial cells. *FASEB J.*  
660 2011;25(11):3873-83. doi: 10.1096/fj.10-170795. PubMed PMID: 21803859; PMCID:  
661 PMC3205840.
- 662 15. Schoumacher M, Goldman RD, Louvard D, Vignjevic DM. Actin, microtubules, and  
663 vimentin intermediate filaments cooperate for elongation of invadopodia. *J Cell Biol.*  
664 2010;189(3):541-56. Epub 2010/04/28. doi: 10.1083/jcb.200909113. PubMed PMID: 20421424;  
665 PMCID: PMC2867303.
- 666 16. Helfand BT, Mendez MG, Murthy SN, Shumaker DK, Grin B, Mahammad S, Aebi U,  
667 Wedig T, Wu YI, Hahn KM, Inagaki M, Herrmann H, Goldman RD. Vimentin organization  
668 modulates the formation of lamellipodia. *Mol Biol Cell.* 2011;22(8):1274-89. Epub 2011/02/25.  
669 doi: 10.1091/mbc.E10-08-0699. PubMed PMID: 21346197; PMCID: PMC3078081.
- 670 17. Zhu QS, Rosenblatt K, Huang KL, Lahat G, Brobey R, Bolshakov S, Nguyen T, Ding Z,  
671 Belousov R, Bill K, Luo X, Lazar A, Dicker A, Mills GB, Hung MC, Lev D. Vimentin is a novel AKT1  
672 target mediating motility and invasion. *Oncogene.* 2011;30(4):457-70. Epub 2010/09/22. doi:  
673 10.1038/onc.2010.421. PubMed PMID: 20856200; PMCID: PMC3010301.
- 674 18. Zelenko Z, Gallagher EJ, Tobin-Hess A, Belardi V, Rostoker R, Blank J, Dina Y, LeRoith D.  
675 Silencing vimentin expression decreases pulmonary metastases in a pre-diabetic mouse model  
676 of mammary tumor progression. *Oncogene.* 2017;36(10):1394-403. Epub 2016/08/30. doi:  
677 10.1038/onc.2016.305. PubMed PMID: 27568979; PMCID: PMC5332535.
- 678 19. Hendrix MJ, Seftor EA, Seftor RE, Trevor KT. Experimental co-expression of vimentin and  
679 keratin intermediate filaments in human breast cancer cells results in phenotypic  
680 interconversion and increased invasive behavior. *Am J Pathol.* 1997;150(2):483-95. Epub  
681 1997/02/01. PubMed PMID: 9033265; PMCID: PMC1858294.
- 682 20. Gilles C, Polette M, Zahm JM, Tournier JM, Volders L, Foidart JM, Birembaut P. Vimentin  
683 contributes to human mammary epithelial cell migration. *J Cell Sci.* 1999;112 ( Pt 24):4615-25.  
684 Epub 1999/11/27. PubMed PMID: 10574710.
- 685 21. Messica Y, Laser-Azogui A, Volberg T, Elisha Y, Lysakovskaia K, Eils R, Gladilin E, Geiger B,  
686 Beck R. The role of Vimentin in Regulating Cell Invasive Migration in Dense Cultures of Breast  
687 Carcinoma Cells. *Nano Lett.* 2017;17(11):6941-8. doi: 10.1021/acs.nanolett.7b03358. PubMed  
688 PMID: 29022351.
- 689 22. Wang W, Yi M, Zhang R, Li J, Chen S, Cai J, Zeng Z, Li X, Xiong W, Wang L, Li G, Xiang B.  
690 Vimentin is a crucial target for anti-metastasis therapy of nasopharyngeal carcinoma. *Mol Cell*  
691 *Biochem.* 2018;438(1-2):47-57. Epub 2017/07/27. doi: 10.1007/s11010-017-3112-z. PubMed  
692 PMID: 28744809.
- 693 23. Chan SH, Tsai JP, Shen CJ, Liao YH, Chen BK. Oleate-induced PTX3 promotes head and  
694 neck squamous cell carcinoma metastasis through the up-regulation of vimentin. *Oncotarget.*  
695 2017;8(25):41364-78. Epub 2017/05/11. doi: 10.18632/oncotarget.17326. PubMed PMID:  
696 28489600; PMCID: PMC5522334.

- 697 24. Liu S, Liu L, Ye W, Ye D, Wang T, Guo W, Liao Y, Xu D, Song H, Zhang L, Zhu H, Deng J,  
698 Zhang Z. High Vimentin Expression Associated with Lymph Node Metastasis and Predicated a  
699 Poor Prognosis in Oral Squamous Cell Carcinoma. *Scientific reports*. 2016;6:38834. doi:  
700 10.1038/srep38834. PubMed PMID: 27966589; PMCID: PMC5155220.
- 701 25. DuPage M, Dooley AL, Jacks T. Conditional mouse lung cancer models using adenoviral  
702 or lentiviral delivery of Cre recombinase. *Nat Protoc*. 2009;4(7):1064-72. Epub 2009/06/30. doi:  
703 10.1038/nprot.2009.95. PubMed PMID: 19561589; PMCID: PMC2757265.
- 704 26. Colucci-Guyon E, Portier MM, Dunia I, Paulin D, Pournin S, Babinet C. Mice lacking  
705 vimentin develop and reproduce without an obvious phenotype. *Cell*. 1994;79(4):679-94. Epub  
706 1994/11/18. doi: 10.1016/0092-8674(94)90553-3. PubMed PMID: 7954832.
- 707 27. Jackson EL, Olive KP, Tuveson DA, Bronson R, Crowley D, Brown M, Jacks T. The  
708 differential effects of mutant p53 alleles on advanced murine lung cancer. *Cancer Res*.  
709 2005;65(22):10280-8. Epub 2005/11/17. doi: 10.1158/0008-5472.CAN-05-2193. PubMed PMID:  
710 16288016.
- 711 28. Soriano P. Generalized lacZ expression with the ROSA26 Cre reporter strain. *Nat Genet*.  
712 1999;21(1):70-1. Epub 1999/01/23. doi: 10.1038/5007. PubMed PMID: 9916792.
- 713 29. Whithaus K, Fukuoka J, Prihoda TJ, Jagirdar J. Evaluation of napsin A, cytokeratin 5/6,  
714 p63, and thyroid transcription factor 1 in adenocarcinoma versus squamous cell carcinoma of  
715 the lung. *Arch Pathol Lab Med*. 2012;136(2):155-62. Epub 2012/02/01. doi: 10.5858/arpa.2011-  
716 0232-OA. PubMed PMID: 22288962.
- 717 30. Simanshu DK, Nissley DV, McCormick F. RAS Proteins and Their Regulators in Human  
718 Disease. *Cell*. 2017;170(1):17-33. Epub 2017/07/01. doi: 10.1016/j.cell.2017.06.009. PubMed  
719 PMID: 28666118; PMCID: PMC5555610.
- 720 31. Nagalingam A, Kuppusamy P, Singh SV, Sharma D, Saxena NK. Mechanistic elucidation of  
721 the antitumor properties of withaferin A in breast cancer. *Cancer Res*. 2014;74(9):2617-29.  
722 Epub 2014/04/16. doi: 10.1158/0008-5472.CAN-13-2081. PubMed PMID: 24732433; PMCID:  
723 PMC4009451.
- 724 32. Suman S, Das TP, Moselhy J, Pal D, Kolluru V, Alatassi H, Ankem MK, Damodaran C. Oral  
725 administration of withaferin A inhibits carcinogenesis of prostate in TRAMP model. *Oncotarget*.  
726 2016;7(33):53751-61. Epub 2016/07/23. doi: 10.18632/oncotarget.10733. PubMed PMID:  
727 27447565; PMCID: PMC5288218.
- 728 33. Kakar SS, Parte S, Carter K, Joshua IG, Worth C, Rameshwar P, Ratajczak MZ. Withaferin  
729 A (WFA) inhibits tumor growth and metastasis by targeting ovarian cancer stem cells.  
730 *Oncotarget*. 2017;8(43):74494-505. Epub 2017/11/02. doi: 10.18632/oncotarget.20170.  
731 PubMed PMID: 29088802; PMCID: PMC5650357.
- 732 34. Bargagna-Mohan P, Hamza A, Kim YE, Khuan Abby Ho Y, Mor-Vaknin N, Wendschlag N,  
733 Liu J, Evans RM, Markovitz DM, Zhan CG, Kim KB, Mohan R. The tumor inhibitor and  
734 antiangiogenic agent withaferin A targets the intermediate filament protein vimentin. *Chem*  
735 *Biol*. 2007;14(6):623-34. Epub 2007/06/23. doi: 10.1016/j.chembiol.2007.04.010. PubMed  
736 PMID: 17584610; PMCID: PMC3228641.
- 737 35. Bollong MJ, Pietila M, Pearson AD, Sarkar TR, Ahmad I, Soundararajan R, Lyssiotis CA,  
738 Mani SA, Schultz PG, Lairson LL. A vimentin binding small molecule leads to mitotic disruption in  
739 mesenchymal cancers. *Proceedings of the National Academy of Sciences of the United States of*

- 740 America. 2017;114(46):E9903-E12. Epub 2017/11/01. doi: 10.1073/pnas.1716009114. PubMed  
741 PMID: 29087350; PMCID: PMC5699095.
- 742 36. Mahesh PP, Retnakumar RJ, Mundayoor S. Downregulation of vimentin in macrophages  
743 infected with live Mycobacterium tuberculosis is mediated by Reactive Oxygen Species. Sci Rep.  
744 2016;6:21526. Epub 2016/02/16. doi: 10.1038/srep21526. PubMed PMID: 26876331; PMCID:  
745 PMC4753491.
- 746 37. Tolstonog GV, Belichenko-Weitzmann IV, Lu JP, Hartig R, Shoeman RL, Traub U, Traub P.  
747 Spontaneously immortalized mouse embryo fibroblasts: growth behavior of wild-type and  
748 vimentin-deficient cells in relation to mitochondrial structure and activity. DNA Cell Biol.  
749 2005;24(11):680-709. Epub 2005/11/09. doi: 10.1089/dna.2005.24.680. PubMed PMID:  
750 16274292.
- 751 38. Mor-Vaknin N, Legendre M, Yu Y, Serezani CH, Garg SK, Jatzek A, Swanson MD,  
752 Gonzalez-Hernandez MJ, Teitz-Tennenbaum S, Punturieri A, Engleberg NC, Banerjee R, Peters-  
753 Golden M, Kao JY, Markovitz DM. Murine colitis is mediated by vimentin. Sci Rep. 2013;3:1045.  
754 Epub 2013/01/11. doi: 10.1038/srep01045. PubMed PMID: 23304436; PMCID: PMC3540396.
- 755 39. Erler JT, Weaver VM. Three-dimensional context regulation of metastasis. Clin Exp  
756 Metastasis. 2009;26(1):35-49. Epub 2008/09/25. doi: 10.1007/s10585-008-9209-8. PubMed  
757 PMID: 18814043; PMCID: PMC2648515.
- 758 40. Chandel NS, McClintock DS, Feliciano CE, Wood TM, Melendez JA, Rodriguez AM,  
759 Schumacker PT. Reactive oxygen species generated at mitochondrial complex III stabilize  
760 hypoxia-inducible factor-1 $\alpha$  during hypoxia: a mechanism of O<sub>2</sub> sensing. J Biol Chem.  
761 2000;275(33):25130-8. Epub 2000/06/02. doi: 10.1074/jbc.M001914200. PubMed PMID:  
762 10833514.
- 763 41. Rankin EB, Giaccia AJ. Hypoxic control of metastasis. Science. 2016;352(6282):175-80.  
764 Epub 2016/04/29. doi: 10.1126/science.aaf4405. PubMed PMID: 27124451; PMCID:  
765 PMC4898055.
- 766 42. Martinez-Reyes I, Chandel NS. Mitochondrial TCA cycle metabolites control physiology  
767 and disease. Nat Commun. 2020;11(1):102. Epub 2020/01/05. doi: 10.1038/s41467-019-13668-  
768 3. PubMed PMID: 31900386; PMCID: PMC6941980.
- 769 43. Alvarez-Tejado M, Naranjo-Suarez S, Jimenez C, Carrera AC, Landazuri MO, del Peso L.  
770 Hypoxia induces the activation of the phosphatidylinositol 3-kinase/Akt cell survival pathway in  
771 PC12 cells: protective role in apoptosis. J Biol Chem. 2001;276(25):22368-74. Epub 2001/04/11.  
772 doi: 10.1074/jbc.M011688200. PubMed PMID: 11294857.
- 773 44. Romero R, Sayin VI, Davidson SM, Bauer MR, Singh SX, LeBoeuf SE, Karakousi TR, Ellis  
774 DC, Bhutkar A, Sanchez-Rivera FJ, Subbaraj L, Martinez B, Bronson RT, Prigge JR, Schmidt EE,  
775 Thomas CJ, Goparaju C, Davies A, Dolgalev I, Heguy A, Allaj V, Poirier JT, Moreira AL, Rudin CM,  
776 Pass HI, Vander Heiden MG, Jacks T, Papagiannakopoulos T. Keap1 loss promotes Kras-driven  
777 lung cancer and results in dependence on glutaminolysis. Nat Med. 2017;23(11):1362-8. Epub  
778 2017/10/03. doi: 10.1038/nm.4407. PubMed PMID: 28967920; PMCID: PMC5677540.
- 779 45. Gibbons DL, Lin W, Creighton CJ, Rizvi ZH, Gregory PA, Goodall GJ, Thilaganathan N, Du  
780 L, Zhang Y, Pertsemliadis A, Kurie JM. Contextual extracellular cues promote tumor cell EMT and  
781 metastasis by regulating miR-200 family expression. Genes Dev. 2009;23(18):2140-51. Epub  
782 2009/09/18. doi: 10.1101/gad.1820209. PubMed PMID: 19759262; PMCID: PMC2751985.

- 783 46. Thomas PA, Kirschmann DA, Cerhan JR, Folberg R, Seftor EA, Sellers TA, Hendrix MJ.  
784 Association between keratin and vimentin expression, malignant phenotype, and survival in  
785 postmenopausal breast cancer patients. *Clin Cancer Res.* 1999;5(10):2698-703. Epub  
786 1999/10/28. PubMed PMID: 10537332.
- 787 47. Peuhu E, Virtakoivu R, Mai A, Warri A, Ivaska J. Epithelial vimentin plays a functional role  
788 in mammary gland development. *Development.* 2017;144(22):4103-13. doi:  
789 10.1242/dev.154229. PubMed PMID: 28947532.
- 790 48. Wang Z, Divanyan A, Jour'd'heuil FL, Goldman RD, Ridge KM, Jour'd'heuil D, Lopez-Soler  
791 RI. Vimentin expression is required for the development of EMT-related renal fibrosis following  
792 unilateral ureteral obstruction in mice. *Am J Physiol Renal Physiol.* 2018;315(4):F769-F80. Epub  
793 2018/04/11. doi: 10.1152/ajprenal.00340.2017. PubMed PMID: 29631355; PMCID:  
794 PMC6335003.
- 795 49. Cheng F, Shen Y, Mohanasundaram P, Lindstrom M, Ivaska J, Ny T, Eriksson JE. Vimentin  
796 coordinates fibroblast proliferation and keratinocyte differentiation in wound healing via TGF-  
797 beta-Slug signaling. *Proceedings of the National Academy of Sciences of the United States of*  
798 *America.* 2016;113(30):E4320-7. Epub 2016/07/29. doi: 10.1073/pnas.1519197113. PubMed  
799 PMID: 27466403; PMCID: PMC4968728.
- 800 50. Ivaska J, Vuoriluoto K, Huovinen T, Izawa I, Inagaki M, Parker PJ. PKCepsilon-mediated  
801 phosphorylation of vimentin controls integrin recycling and motility. *EMBO J.* 2005;24(22):3834-  
802 45. Epub 2005/11/05. doi: 10.1038/sj.emboj.7600847. PubMed PMID: 16270034; PMCID:  
803 PMC1283946.
- 804 51. Thaiparambil JT, Bender L, Ganesh T, Kline E, Patel P, Liu Y, Tighiouart M, Vertino PM,  
805 Harvey RD, Garcia A, Marcus AI. Withaferin A inhibits breast cancer invasion and metastasis at  
806 sub-cytotoxic doses by inducing vimentin disassembly and serine 56 phosphorylation. *Int J*  
807 *Cancer.* 2011;129(11):2744-55. Epub 2011/05/04. doi: 10.1002/ijc.25938. PubMed PMID:  
808 21538350.
- 809 52. Bargagna-Mohan P, Lei L, Thompson A, Shaw C, Kasahara K, Inagaki M, Mohan R.  
810 Vimentin Phosphorylation Underlies Myofibroblast Sensitivity to Withaferin A In Vitro and  
811 during Corneal Fibrosis. *PLoS One.* 2015;10(7):e0133399. Epub 2015/07/18. doi:  
812 10.1371/journal.pone.0133399. PubMed PMID: 26186445; PMCID: PMC4506086.
- 813 53. Haversen L, Sundelin JP, Mardinoglu A, Rutberg M, Stahlman M, Wilhelmsson U, Hulten  
814 LM, Pekny M, Fogelstrand P, Bentzon JF, Levin M, Boren J. Vimentin deficiency in macrophages  
815 induces increased oxidative stress and vascular inflammation but attenuates atherosclerosis in  
816 mice. *Sci Rep.* 2018;8(1):16973. Epub 2018/11/20. doi: 10.1038/s41598-018-34659-2. PubMed  
817 PMID: 30451917; PMCID: PMC6242955.
- 818 54. Chang HW, Li RN, Wang HR, Liu JR, Tang JY, Huang HW, Chan YH, Yen CY. Withaferin A  
819 Induces Oxidative Stress-Mediated Apoptosis and DNA Damage in Oral Cancer Cells. *Front*  
820 *Physiol.* 2017;8:634. Epub 2017/09/25. doi: 10.3389/fphys.2017.00634. PubMed PMID:  
821 28936177; PMCID: PMC5594071.
- 822 55. LeBert D, Squirrell JM, Freisinger C, Rindy J, Golenberg N, Frecentese G, Gibson A, Eliceiri  
823 KW, Huttenlocher A. Damage-induced reactive oxygen species regulate vimentin and dynamic  
824 collagen-based projections to mediate wound repair. *Elife.* 2018;7. Epub 2018/01/18. doi:  
825 10.7554/eLife.30703. PubMed PMID: 29336778; PMCID: PMC5790375.

- 826 56. Li QF, Spinelli AM, Tang DD. Cdc42GAP, reactive oxygen species, and the vimentin  
827 network. *Am J Physiol Cell Physiol*. 2009;297(2):C299-309. Epub 2009/06/06. doi:  
828 10.1152/ajpcell.00037.2009. PubMed PMID: 19494238; PMCID: PMC2724092.
- 829 57. Weinberg F, Hamanaka R, Wheaton WW, Weinberg S, Joseph J, Lopez M, Kalyanaraman  
830 B, Mutlu GM, Budinger GR, Chandel NS. Mitochondrial metabolism and ROS generation are  
831 essential for Kras-mediated tumorigenicity. *Proceedings of the National Academy of Sciences of  
832 the United States of America*. 2010;107(19):8788-93. doi: 10.1073/pnas.1003428107. PubMed  
833 PMID: 20421486; PMCID: PMC2889315.
- 834 58. Matveeva EA, Chernovanenko, I.S. & Minin, A.A. Vimentin intermediate filaments  
835 protect mitochondria from oxidative stress. *Biochem Moscow Suppl Ser A* 2010(4):321–31. doi:  
836 <https://doi.org/10.1134/S199074781004001X>.
- 837 59. Matveeva EA, Venkova LS, Chernovanenko IS, Minin AA. Vimentin is involved in  
838 regulation of mitochondrial motility and membrane potential by Rac1. *Biol Open*.  
839 2015;4(10):1290-7. Epub 2015/09/16. doi: 10.1242/bio.011874. PubMed PMID: 26369929;  
840 PMCID: PMC4610213.
- 841 60. Nekrasova OE, Mendez MG, Chernovanenko IS, Tyurin-Kuzmin PA, Kuczmarski ER,  
842 Gelfand VI, Goldman RD, Minin AA. Vimentin intermediate filaments modulate the motility of  
843 mitochondria. *Mol Biol Cell*. 2011;22(13):2282-9. Epub 2011/05/13. doi: 10.1091/mbc.E10-09-  
844 0766. PubMed PMID: 21562225; PMCID: PMC3128530.
- 845 61. Gaude E, Frezza C. Tissue-specific and convergent metabolic transformation of cancer  
846 correlates with metastatic potential and patient survival. *Nat Commun*. 2016;7:13041. Epub  
847 2016/10/11. doi: 10.1038/ncomms13041. PubMed PMID: 27721378; PMCID: PMC5062467.
- 848 62. dos Santos G, Rogel MR, Baker MA, Troken JR, Urich D, Morales-Nebreda L, Sennello JA,  
849 Kutuzov MA, Sitikov A, Davis JM, Lam AP, Cheresch P, Kamp D, Shumaker DK, Budinger GR, Ridge  
850 KM. Vimentin regulates activation of the NLRP3 inflammasome. *Nat Commun*. 2015;6:6574.  
851 doi: 10.1038/ncomms7574. PubMed PMID: 25762200; PMCID: PMC4358756.
- 852 63. Huang SH, Chi F, Peng L, Bo T, Zhang B, Liu LQ, Wu X, Mor-Vaknin N, Markovitz DM, Cao  
853 H, Zhou YH. Vimentin, a Novel NF-kappaB Regulator, Is Required for Meningitic Escherichia coli  
854 K1-Induced Pathogen Invasion and PMN Transmigration across the Blood-Brain Barrier. *PLoS  
855 One*. 2016;11(9):e0162641. Epub 2016/09/23. doi: 10.1371/journal.pone.0162641. PubMed  
856 PMID: 27657497; PMCID: PMC5033352.
- 857 64. Jiang SX, Slinn J, Aylsworth A, Hou ST. Vimentin participates in microglia activation and  
858 neurotoxicity in cerebral ischemia. *J Neurochem*. 2012;122(4):764-74. Epub 2012/06/12. doi:  
859 10.1111/j.1471-4159.2012.07823.x. PubMed PMID: 22681613.
- 860 65. McDonald-Hyman C, Muller JT, Loschi M, Thangavelu G, Saha A, Kumari S, Reichenbach  
861 DK, Smith MJ, Zhang G, Koehn BH, Lin J, Mitchell JS, Fife BT, Panoskaltis-Mortari A, Feser CJ,  
862 Kirchmeier AK, Osborn MJ, Hippen KL, Kelekar A, Serody JS, Turka LA, Munn DH, Chi H, Neubert  
863 TA, Dustin ML, Blazar BR. The vimentin intermediate filament network restrains regulatory T  
864 cell suppression of graft-versus-host disease. *J Clin Invest*. 2018;128(10):4604-21. doi:  
865 10.1172/JCI95713. PubMed PMID: 30106752; PMCID: PMC6159973.
- 866 66. Richardson AM, Havel LS, Koyen AE, Konen JM, Shupe J, Wiles Wgt, Martin WD,  
867 Grossniklaus HE, Sica G, Gilbert-Ross M, Marcus AI. Vimentin Is Required for Lung  
868 Adenocarcinoma Metastasis via Heterotypic Tumor Cell-Cancer-Associated Fibroblast



- 869 Interactions during Collective Invasion. *Clin Cancer Res.* 2018;24(2):420-32. doi: 10.1158/1078-  
870 0432.CCR-17-1776. PubMed PMID: 29208669; PMCID: PMC5771825.
- 871 67. Karki R, Kanneganti TD. Diverging inflammasome signals in tumorigenesis and potential  
872 targeting. *Nat Rev Cancer.* 2019;19(4):197-214. Epub 2019/03/08. doi: 10.1038/s41568-019-  
873 0123-y. PubMed PMID: 30842595; PMCID: PMC6953422.
- 874 68. Guo B, Fu S, Zhang J, Liu B, Li Z. Targeting inflammasome/IL-1 pathways for cancer  
875 immunotherapy. *Sci Rep.* 2016;6:36107. Epub 2016/10/28. doi: 10.1038/srep36107. PubMed  
876 PMID: 27786298; PMCID: PMC5082376.
- 877 69. Al-Saad S, Al-Shibli K, Donnem T, Persson M, Bremnes RM, Busund LT. The prognostic  
878 impact of NF-kappaB p105, vimentin, E-cadherin and Par6 expression in epithelial and stromal  
879 compartment in non-small-cell lung cancer. *Br J Cancer.* 2008;99(9):1476-83. Epub 2008/10/16.  
880 doi: 10.1038/sj.bjc.6604713. PubMed PMID: 18854838; PMCID: PMC2579693.
- 881 70. Lanier MH, Kim T, Cooper JA. CARMIL2 is a novel molecular connection between  
882 vimentin and actin essential for cell migration and invadopodia formation. *Mol Biol Cell.*  
883 2015;26(25):4577-88. Epub 2015/10/16. doi: 10.1091/mbc.E15-08-0552. PubMed PMID:  
884 26466680; PMCID: PMC4678016.
- 885 71. Challa AA, Stefanovic B. A novel role of vimentin filaments: binding and stabilization of  
886 collagen mRNAs. *Mol Cell Biol.* 2011;31(18):3773-89. doi: 10.1128/MCB.05263-11. PubMed  
887 PMID: 21746880; PMCID: PMC3165730.
- 888 72. Gan Z, Ding L, Burckhardt CJ, Lowery J, Zaritsky A, Sitterley K, Mota A, Costigliola N,  
889 Starker CG, Voytas DF, Tytell J, Goldman RD, Danuser G. Vimentin Intermediate Filaments  
890 Template Microtubule Networks to Enhance Persistence in Cell Polarity and Directed Migration.  
891 *Cell Syst.* 2016;3(3):252-63 e8. Epub 2016/09/27. doi: 10.1016/j.cels.2016.08.007. PubMed  
892 PMID: 27667364; PMCID: PMC5055390.
- 893 73. Costigliola N, Ding L, Burckhardt CJ, Han SJ, Gutierrez E, Mota A, Groisman A, Mitchison  
894 TJ, Danuser G. Vimentin fibers orient traction stress. *Proceedings of the National Academy of  
895 Sciences of the United States of America.* 2017;114(20):5195-200. Epub 2017/05/04. doi:  
896 10.1073/pnas.1614610114. PubMed PMID: 28465431; PMCID: PMC5441818.
- 897 74. Eden E, Lipson D, Yogev S, Yakhini Z. Discovering motifs in ranked lists of DNA  
898 sequences. *PLoS Comput Biol.* 2007;3(3):e39. Epub 2007/03/27. doi:  
899 10.1371/journal.pcbi.0030039. PubMed PMID: 17381235; PMCID: PMC1829477.
- 900 75. Eden E, Navon R, Steinfeld I, Lipson D, Yakhini Z. GOrilla: a tool for discovery and  
901 visualization of enriched GO terms in ranked gene lists. *BMC Bioinformatics.* 2009;10:48. doi:  
902 10.1186/1471-2105-10-48. PubMed PMID: 19192299; PMCID: PMC2644678.
- 903 76. Zhang L, Lee NJ, Nguyen AD, Enriquez RF, Riepler SJ, Stehrer B, Yulyaningsih E, Lin S, Shi  
904 YC, Baldock PA, Herzog H, Sainsbury A. Additive actions of the cannabinoid and neuropeptide Y  
905 systems on adiposity and lipid oxidation. *Diabetes Obes Metab.* 2010;12(7):591-603. Epub  
906 2010/07/02. doi: 10.1111/j.1463-1326.2009.01193.x. PubMed PMID: 20590734.
- 907 77. Gilbert-Ross M, Konen J, Koo J, Shupe J, Robinson BS, Wiles WGt, Huang C, Martin WD,  
908 Behera M, Smith GH, Hill CE, Rossi MR, Sica GL, Rupji M, Chen Z, Kowalski J, Kasinski AL,  
909 Ramalingam SS, Fu H, Khuri FR, Zhou W, Marcus AI. Targeting adhesion signaling in KRAS, LKB1  
910 mutant lung adenocarcinoma. *JCI Insight.* 2017;2(5):e90487. Epub 2017/03/16. doi:  
911 10.1172/jci.insight.90487. PubMed PMID: 28289710; PMCID: PMC5333956 exists.

912 78. Chong J, Soufan O, Li C, Caraus I, Li S, Bourque G, Wishart DS, Xia J. MetaboAnalyst 4.0:  
913 towards more transparent and integrative metabolomics analysis. *Nucleic Acids Res.*  
914 2018;46(W1):W486-W94. Epub 2018/05/16. doi: 10.1093/nar/gky310. PubMed PMID:  
915 29762782; PMCID: PMC6030889.  
916

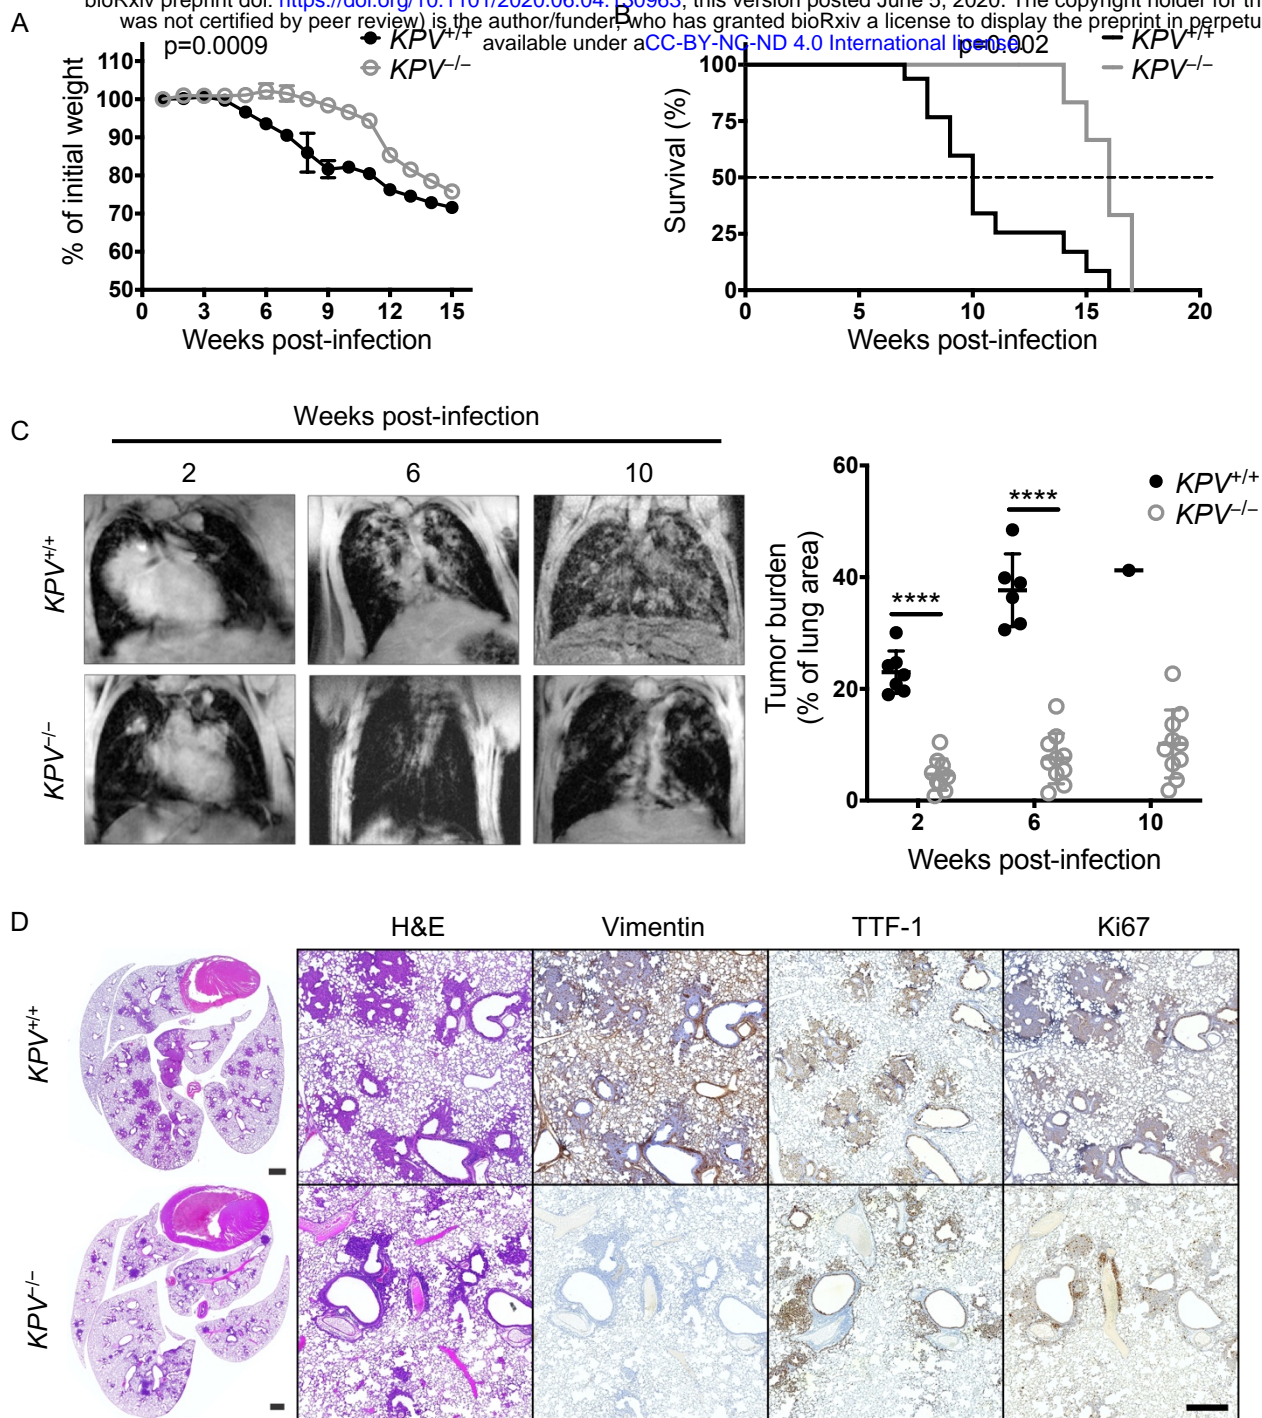

**Figure 1. Vimentin-null mice have reduced tumor burden and improved survival in a preclinical *LSL-Kras<sup>G12D</sup>Tp53<sup>fl/fl</sup>*-driven mouse model of lung cancer.** *LSL-Kras<sup>G12D</sup>Tp53<sup>fl/fl</sup>* (*KPV<sup>+/+</sup>*) mice were crossed with *Vim<sup>-/-</sup>* mice to produce *KPV<sup>-/-</sup>* mice, then *KPV<sup>+/+</sup>* and *KPV<sup>-/-</sup>* mice were intubated with  $10^9$  PFUs of adenoviral Cre. (A) Weight loss (n=6 mice for *KPV<sup>+/+</sup>* group; n=7 mice for *KPV<sup>-/-</sup>* group; mixed model ANOVA, for *KPV<sup>+/+</sup>* versus *KPV<sup>-/-</sup>*, p=0.0009) and (B) survival (n=15 mice for *KPV<sup>+/+</sup>* group; n=10 mice for *KPV<sup>-/-</sup>* group; Mantel-Cox log-rank test, p=0.002) were monitored. (C) Representative MRI scans (*left*) showing mouse lung tumors at 2, 6, and 10 weeks post-infection with  $10^9$  PFUs of adenoviral Cre. Tumor burden was quantified using Jim software (*right*). Each point represents one mouse (\*\*\*\*p<0.0001 by unpaired, two-tailed t-test). (D) Lungs were isolated from *KPV<sup>+/+</sup>* mice (6 weeks post-infection shown) and *KPV<sup>-/-</sup>* mice (7 weeks post-infection shown) infected with  $10^9$  PFUs of adenoviral Cre. Shown from left to right are representative fixed whole lung sections with H&E staining and close-up views of fixed lung sections with H&E staining and vimentin, TTF-1, and Ki67 immunohistochemical staining. Positively immunostained cells appear brown, and nuclei are dyed blue. Scale bars: 1 mm (whole lungs, *left*), 200  $\mu$ m (*right*). This figure represents combined data from three independent experiments.

A

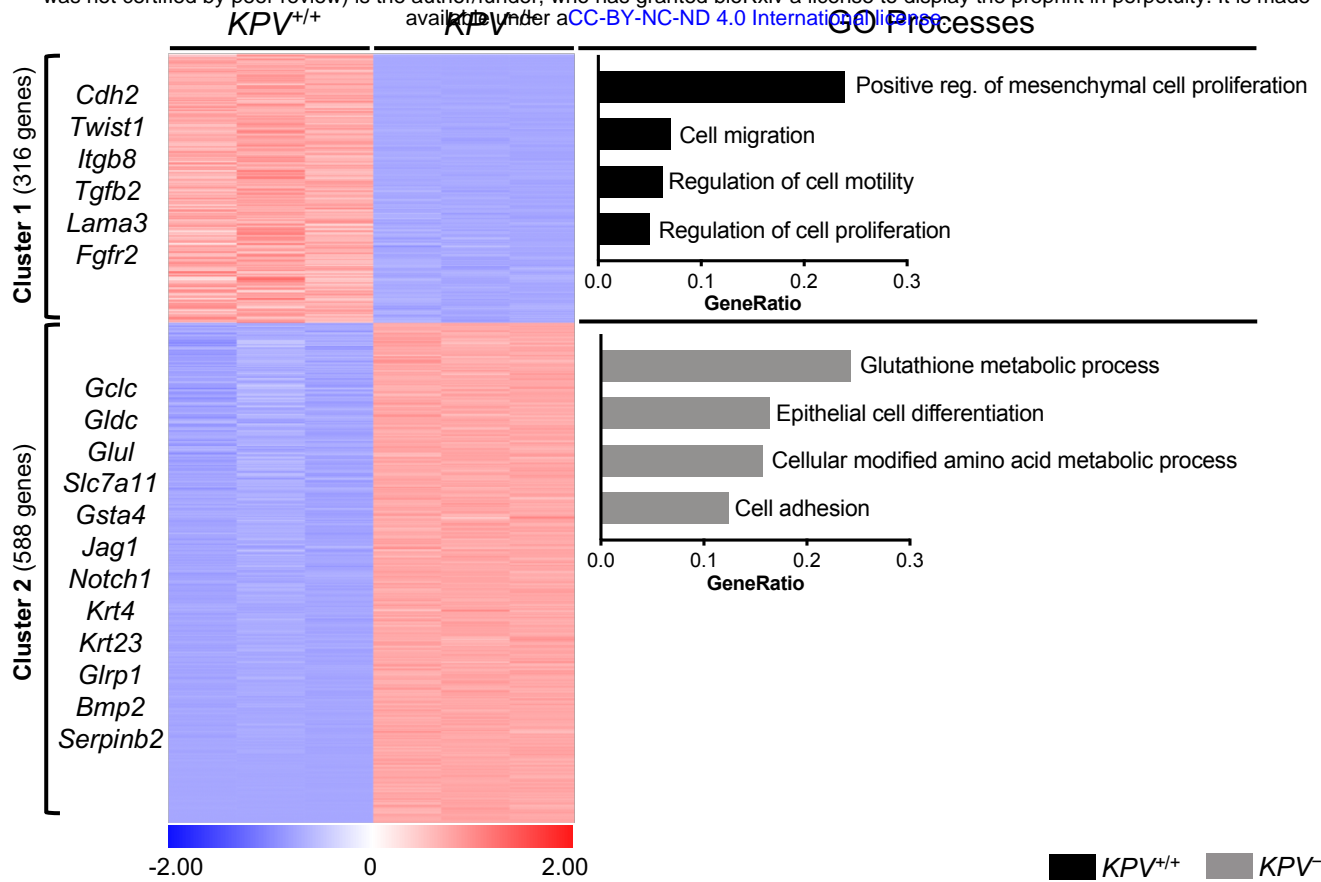

B

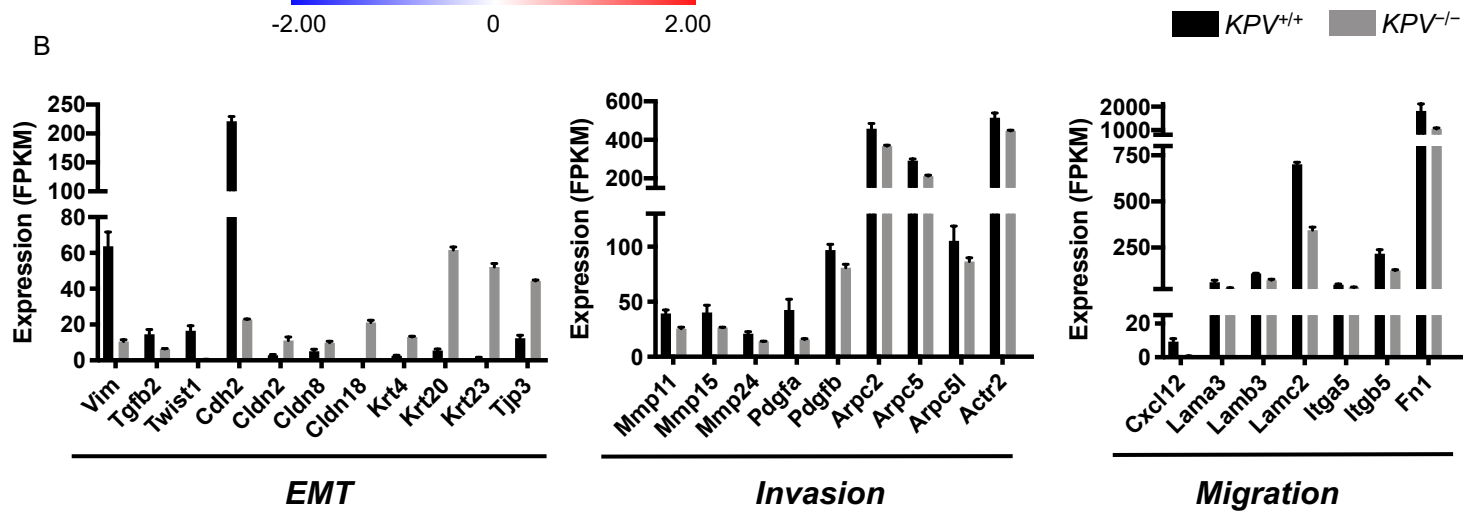

**Figure 2.  $KPV^{-/-}$  cells have decreased expression of genes involved in EMT.** Messenger RNA collected from  $KPV^{+/+}$  and  $KPV^{-/-}$  cells was subjected to RNA-sequencing. (A) Differentially expressed genes (DEGs) between  $KPV^{+/+}$  and  $KPV^{-/-}$  cells were clustered using K-means clustering. Genes enriched in Cluster 1 (316 genes) and Cluster 2 (588 genes) were subject to GO enrichment analysis. GO Processes with FDR<0.05 are shown. GeneRatio is the number of genes present in the cluster that are associated with the GO process divided by the total number of genes in that GO process. (B) Expression values (FPKM) of select genes are shown. N=3 for each group. Data in panel B are presented as the mean  $\pm$  standard deviation. All gene comparisons shown ( $KPV^{+/+}$  vs  $KPV^{-/-}$ ) have FDR<0.05 after adjusting for multiple comparisons.

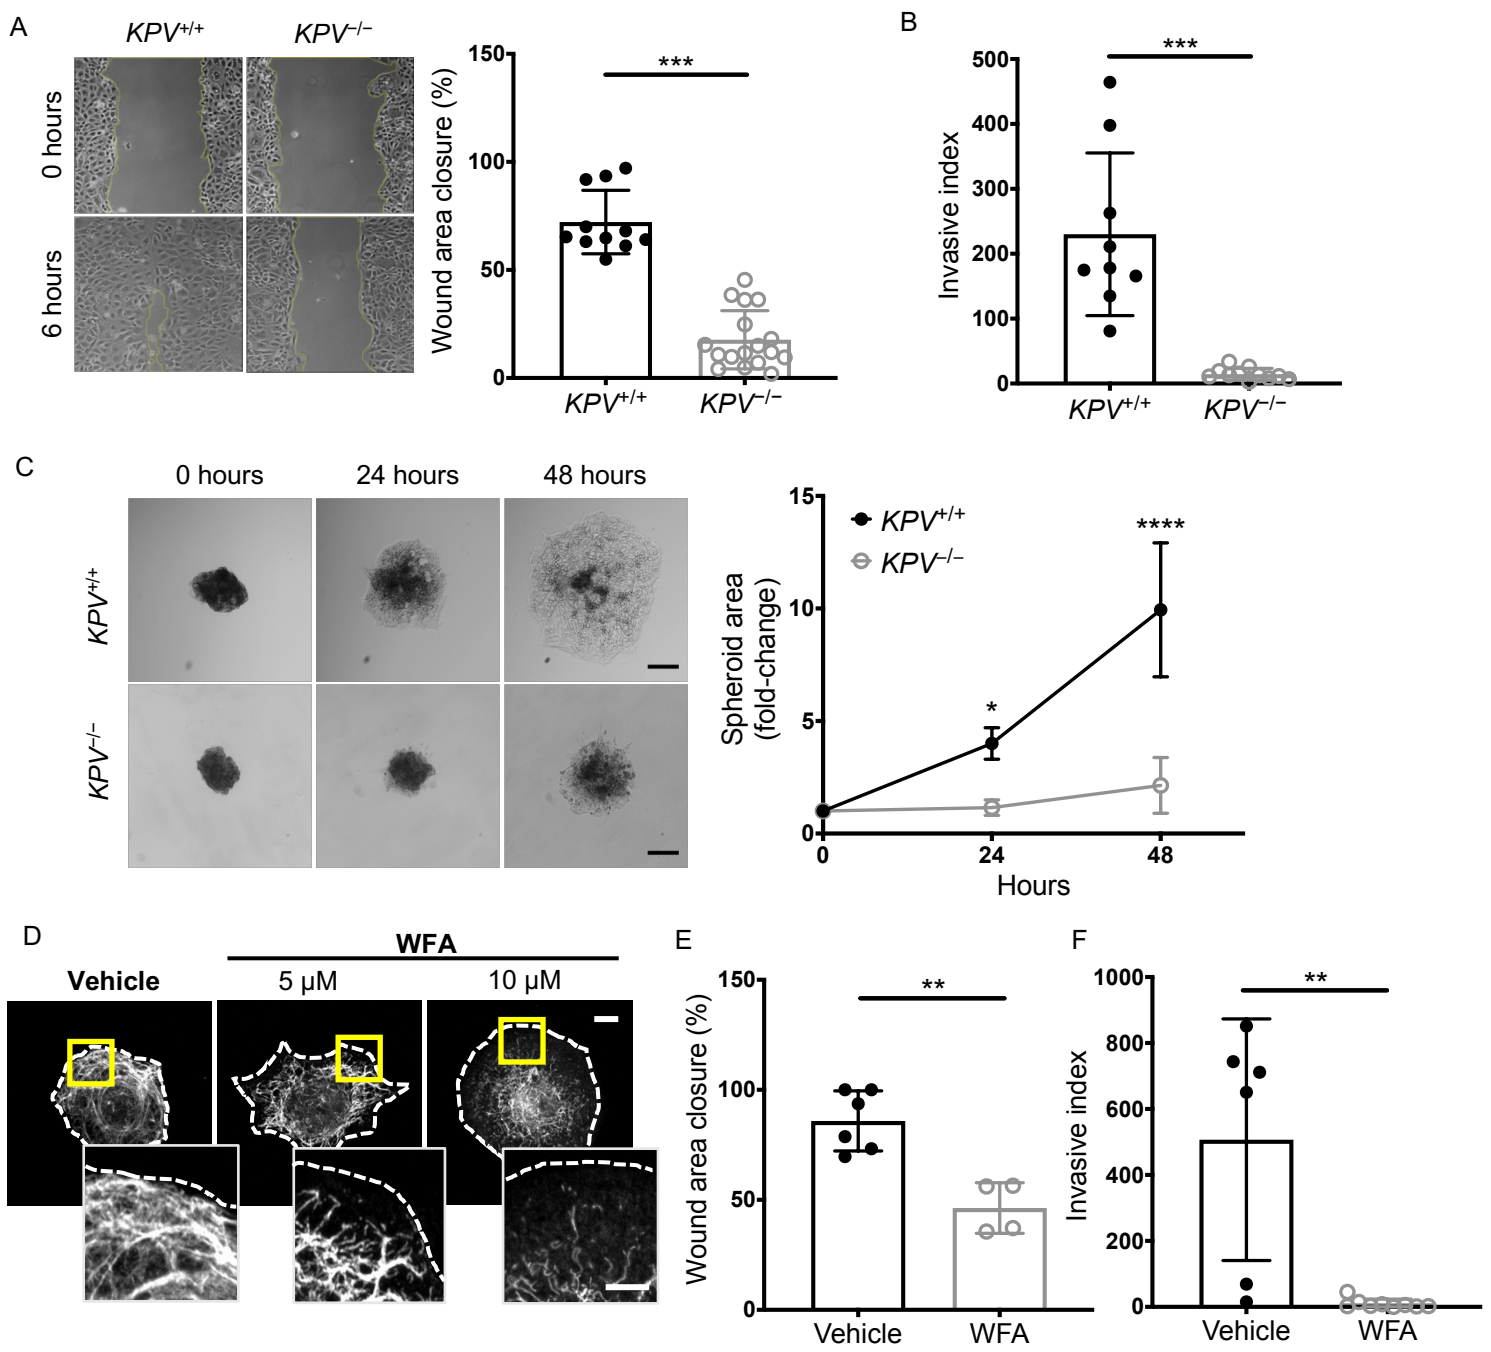

**Figure 3. Vimentin is required for *in vitro* cancer cell migration and invasion.** (A) A scratch wound assay was used to evaluate cell migration. Representative images are shown at 0 and 6 hours following scratch formation. Wound area closure was compared to the starting value and quantified for *KPV<sup>+/+</sup>* (n=11) and *KPV<sup>-/-</sup>* (n=17) cells; each point represents a separate scratch wound. (B) Cell invasion through a Matrigel-coated transwell was measured over 48 hours. Invasive index is the mean number of cells invaded per 20× magnification imaging field. *KPV<sup>+/+</sup>* (n=9) and *KPV<sup>-/-</sup>* (n=11) cell invasion data are plotted so that each point represents data from a single transwell assay. (C) *KPV<sup>+/+</sup>* and *KPV<sup>-/-</sup>* spheroids were suspended in type I collagen and spheroid growth was tracked over 48 hours. Spheroid area was quantified relative to the initial area of each spheroid (n=4 independent experiments). Scale bar: 200 μM. (D) *KPV<sup>+/+</sup>* cells were treated with withaferin A (WFA; 5 or 10 μM) or DMSO vehicle control for 6 hours. Cells were stained for vimentin (white). Cell outline (dotted line) was drawn on an image of the same cell stained for keratin. Scale: 10 μm; inset: 5 μm. (E) *KPV<sup>+/+</sup>* cells were treated with vehicle (n=6) or 5 μM WFA (n=4) and were subjected to a scratch wound assay. Wound area was quantified at 6 hours. (F) *KPV<sup>+/+</sup>* cells were plated atop a Matrigel-coated transwell and were treated with vehicle control (n=6) or 5 μM WFA (n=9); invasion was quantified at 48 hours via invasive index as described above. Data are presented as the mean ± standard deviation. The p-values were calculated using an unpaired, two-tailed t-test, except for panel C, in which data were compared using a repeated-measure two-way ANOVA with multiple comparisons. (\*p<0.05; \*\*p<0.01; \*\*\*p<0.001; \*\*\*\*p<0.0001).

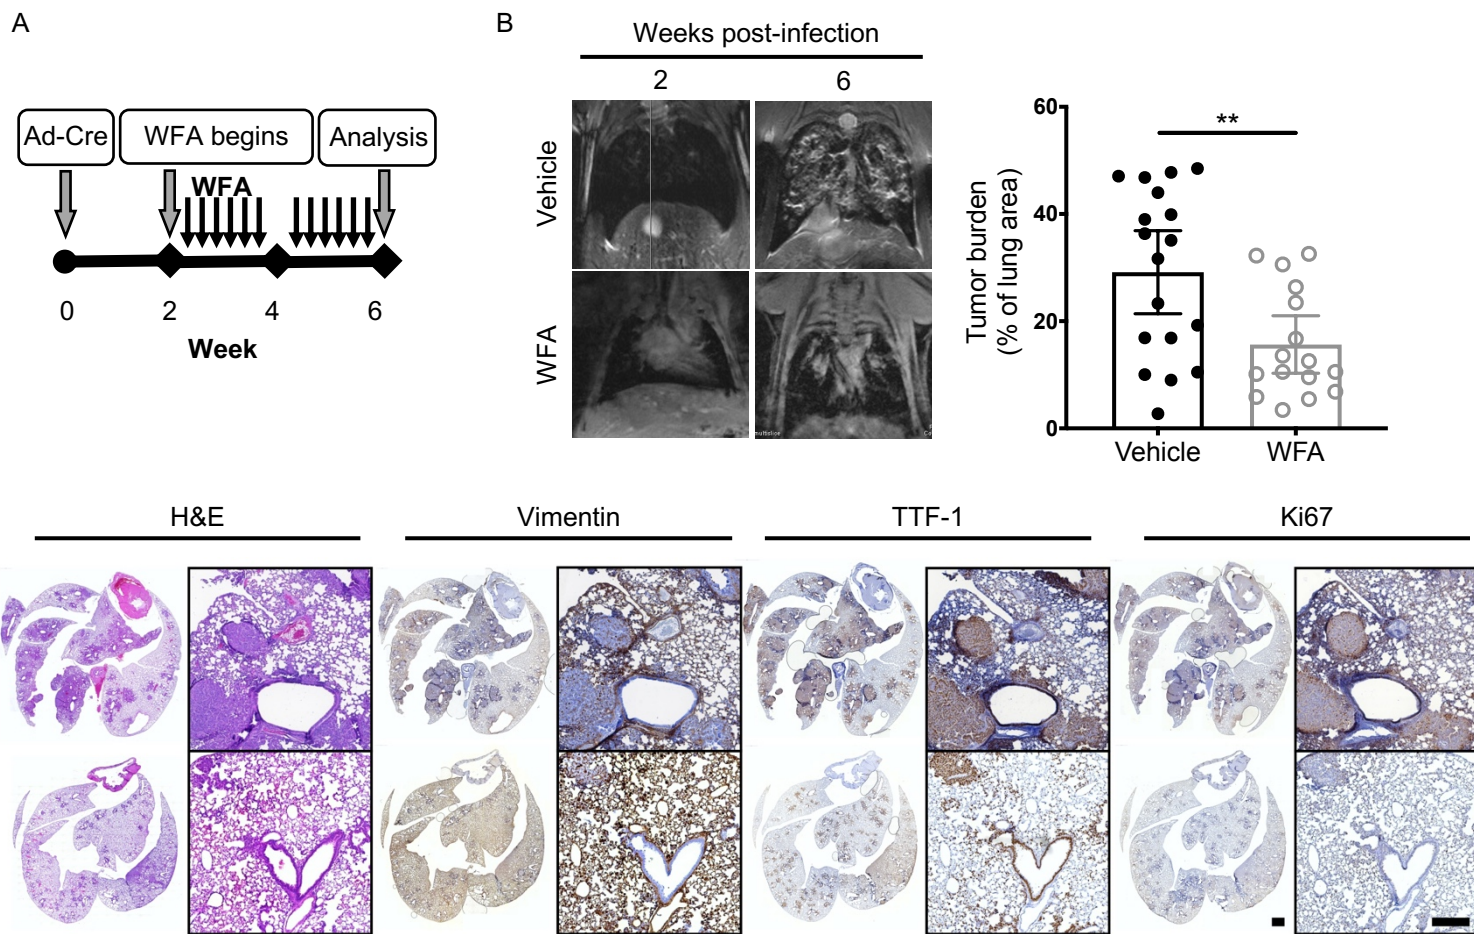

**Figure 4. WFA treatment attenuates lung cancer progression.** (A) Schematic of experimental design.  $KPV^{+/+}$  mice were treated with withaferin A (WFA; 4 mg/kg; Q.O.D., p.o.) or vehicle control (DMSO) at 2 weeks post-infection with  $10^7$  PFUs of adenoviral Cre. (B) Representative MRI scans show WFA-treated  $KPV^{+/+}$  lung tumors at 6 weeks post-infection with  $10^7$  PFUs of adenoviral Cre (left). Dot plot illustrates the tumor volume between WFA-treated or vehicle-treated control  $KPV^{+/+}$  mice (right). Each point represents, for one mouse, the percentage of lung area on MRI occupied by tumor, as measured using Jim software. Data are presented as the mean  $\pm$  standard deviation (\*\* $p < 0.01$  by unpaired, two-tailed t-test). (C) Lungs isolated from vehicle- or WFA-treated  $KPV^{+/+}$  mice at 6 weeks after adenoviral Cre infection were fixed, sectioned, and subjected to H&E staining and vimentin, TTF-1, and Ki67 immunohistochemical staining. Positively immunostained cells appear brown, and nuclei are dyed blue. Scale bars: 2 mm (whole lungs, left), 200  $\mu$ M (right).

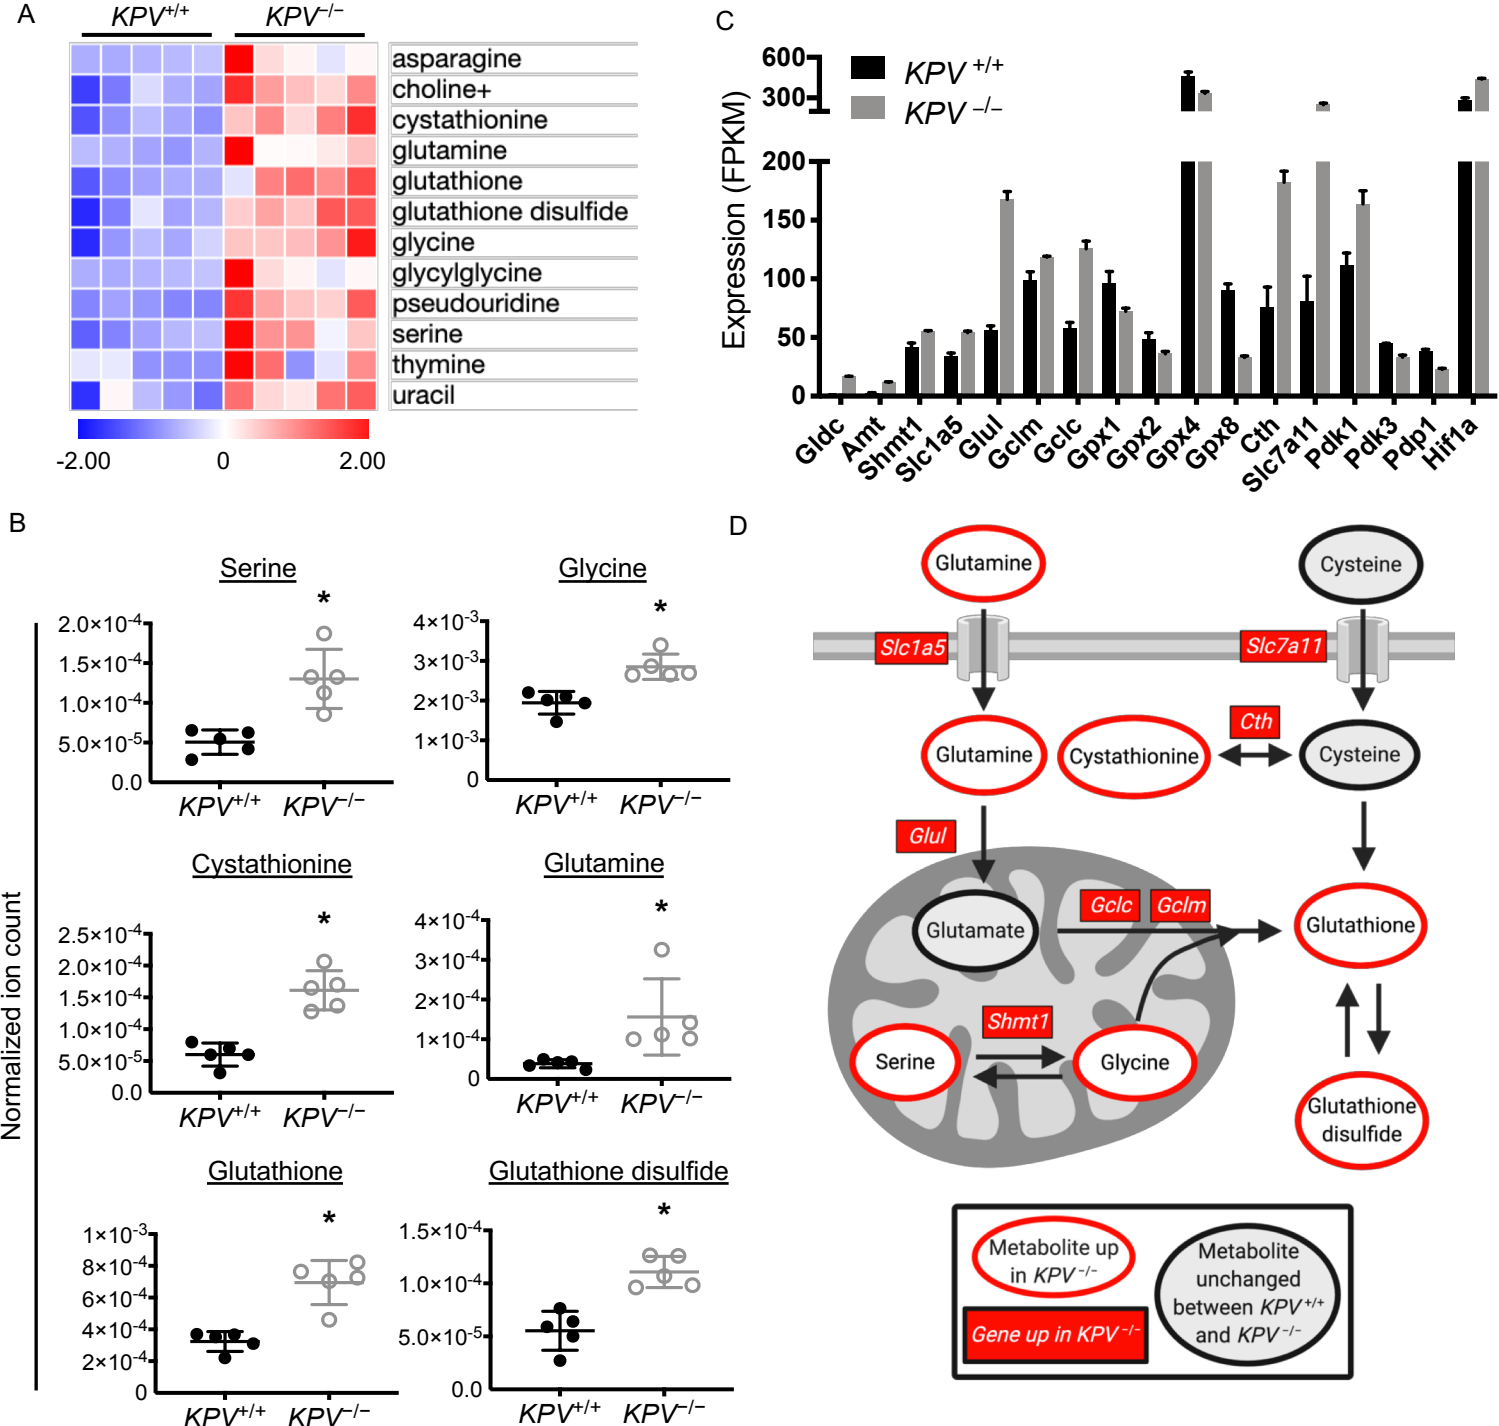

**Figure 5. *KPV*<sup>-/-</sup> cells accumulate glutathione.** (A) Differentially produced metabolites are plotted with each row representing z-scores for each metabolite. (B) Ion counts were normalized to the total ion count for each sample. Each group represents n=5. For panels A-B, metabolite data was log-transformed and then subjected to an unpaired two-tailed t-test; p-values were corrected for multiple comparisons (\*adjusted p-value<0.05). (C) Select gene expression values from RNA-sequencing. All genes shown had FDR<0.05. (D) Schematic showing key metabolites (ovals) and genes (rectangles) involved in cell production of glutathione. Metabolites and genes downregulated in *KPV*<sup>-/-</sup> cells compared to *KPV*<sup>+/+</sup> cells are shown in red. All data are presented as the mean ± standard deviation.

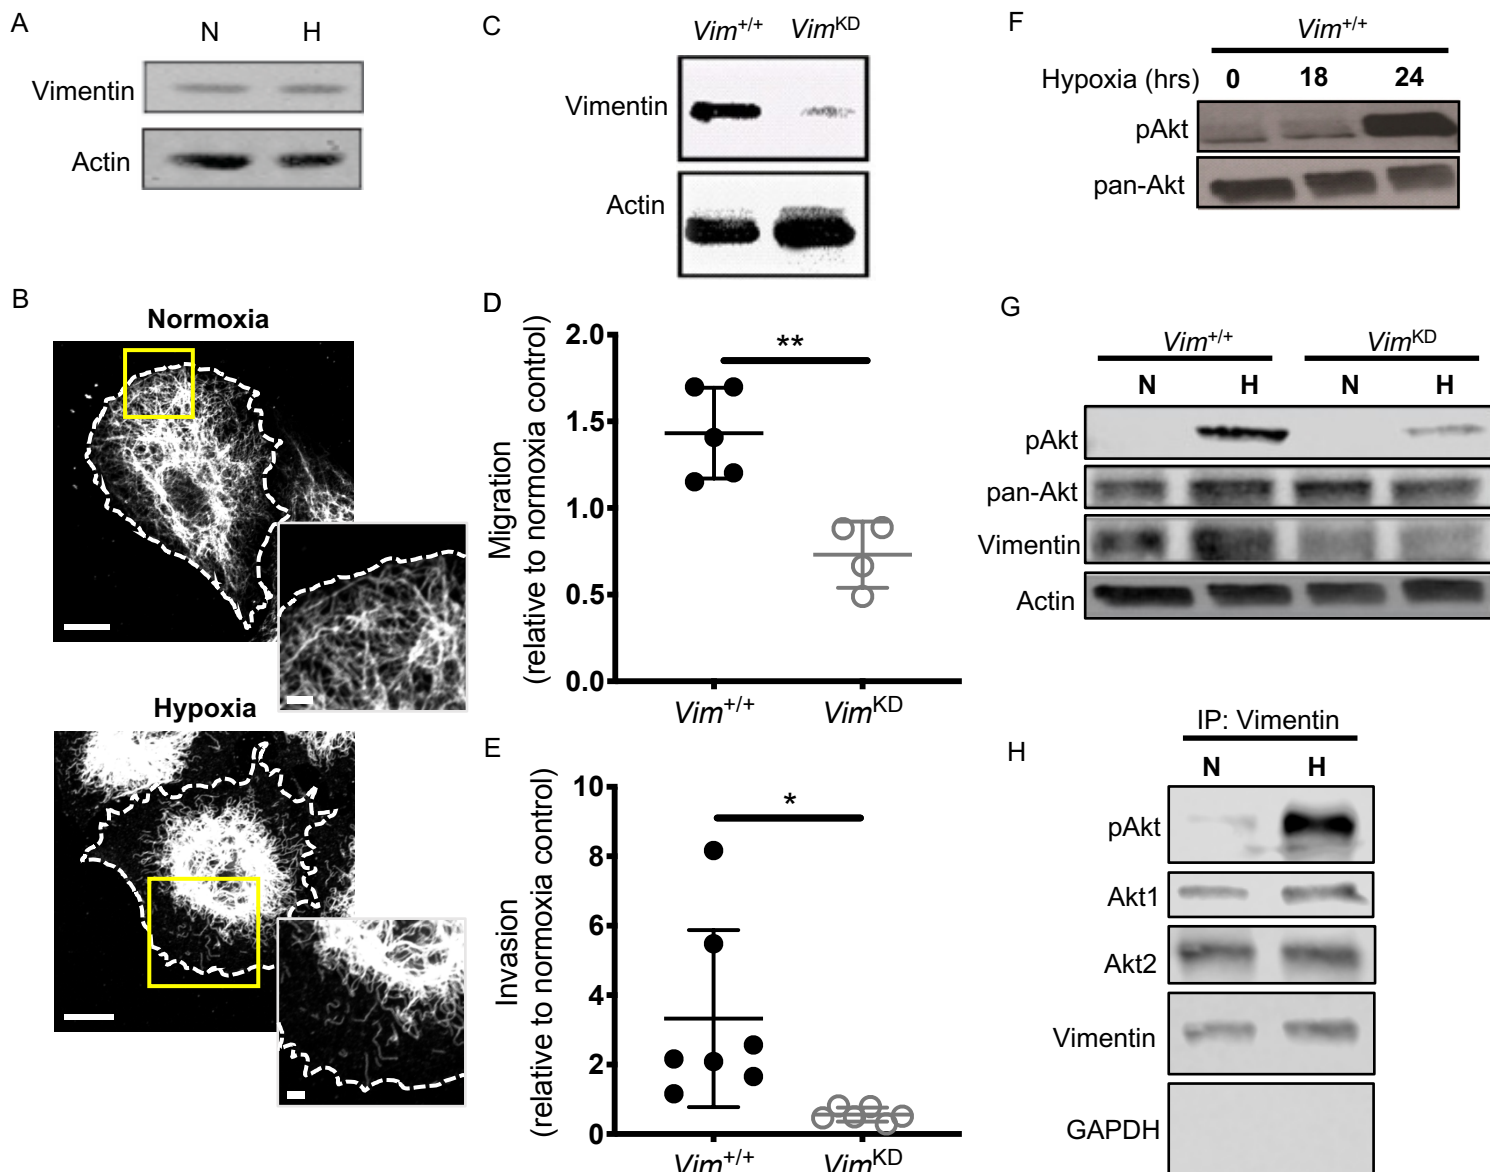

**Figure 6. Vimentin is required for hypoxia-mediated cell migration and invasion.** (A) Vimentin wild-type (*Vim*<sup>+/+</sup>) A549 cells were cultured in normoxic (N; 20% O<sub>2</sub>) or hypoxic (H; 1.5% O<sub>2</sub>) conditions for 24 hours. Total cell lysates were collected, separated by SDS-PAGE, and immunoblotted with antibodies against vimentin and actin. (B) Representative confocal images of A549 cells exposed to normoxic or hypoxic conditions for 24 hours. Cells were fixed and stained for vimentin (white). A phase contrast image was used to identify cell borders (dashed line). Scale bars: 10  $\mu$ m (*whole cells*), 2  $\mu$ m (*inset*). (C) *Vim*<sup>+/+</sup> A549 cells were treated with a retroviral vector expressing shRNA against vimentin (*Vim*<sup>KD</sup>). Total cell lysates were collected, separated by SDS-PAGE, and immunoblotted with antibodies against vimentin and actin. (D, E) Cells were cultured in hypoxic conditions, and migration over 6 hours (D, n=3–4) and invasion over 24 hours (E, n=6–8) were quantified. Each data point represents an independent experiment normalized to an average normoxic control. Data were compared using a two-tailed t-test and are presented as the mean  $\pm$  standard deviation (\*p<0.05; \*\*p<0.01). (F) *Vim*<sup>+/+</sup> cells were exposed to hypoxia for the indicated time; total cell lysates were collected, separated by SDS-PAGE, and immunoblotted with antibodies against phosphorylated Akt (pAkt; Ser473) and pan-Akt. (G) *Vim*<sup>+/+</sup> and *Vim*<sup>KD</sup> cells were exposed to hypoxia or normoxia for 24 hours. Total cell lysates were collected, separated by SDS-PAGE, and immunoblotted with antibodies against vimentin, pan-Akt, pAkt, and actin. (H) Vimentin was immunoprecipitated from total protein extracts derived from A549 cells exposed to normoxic or hypoxic conditions for 24 hours. Proteins were separated by SDS-PAGE and immunoblotted with antibodies against pAkt, Akt1, Akt2, vimentin, and GAPDH.



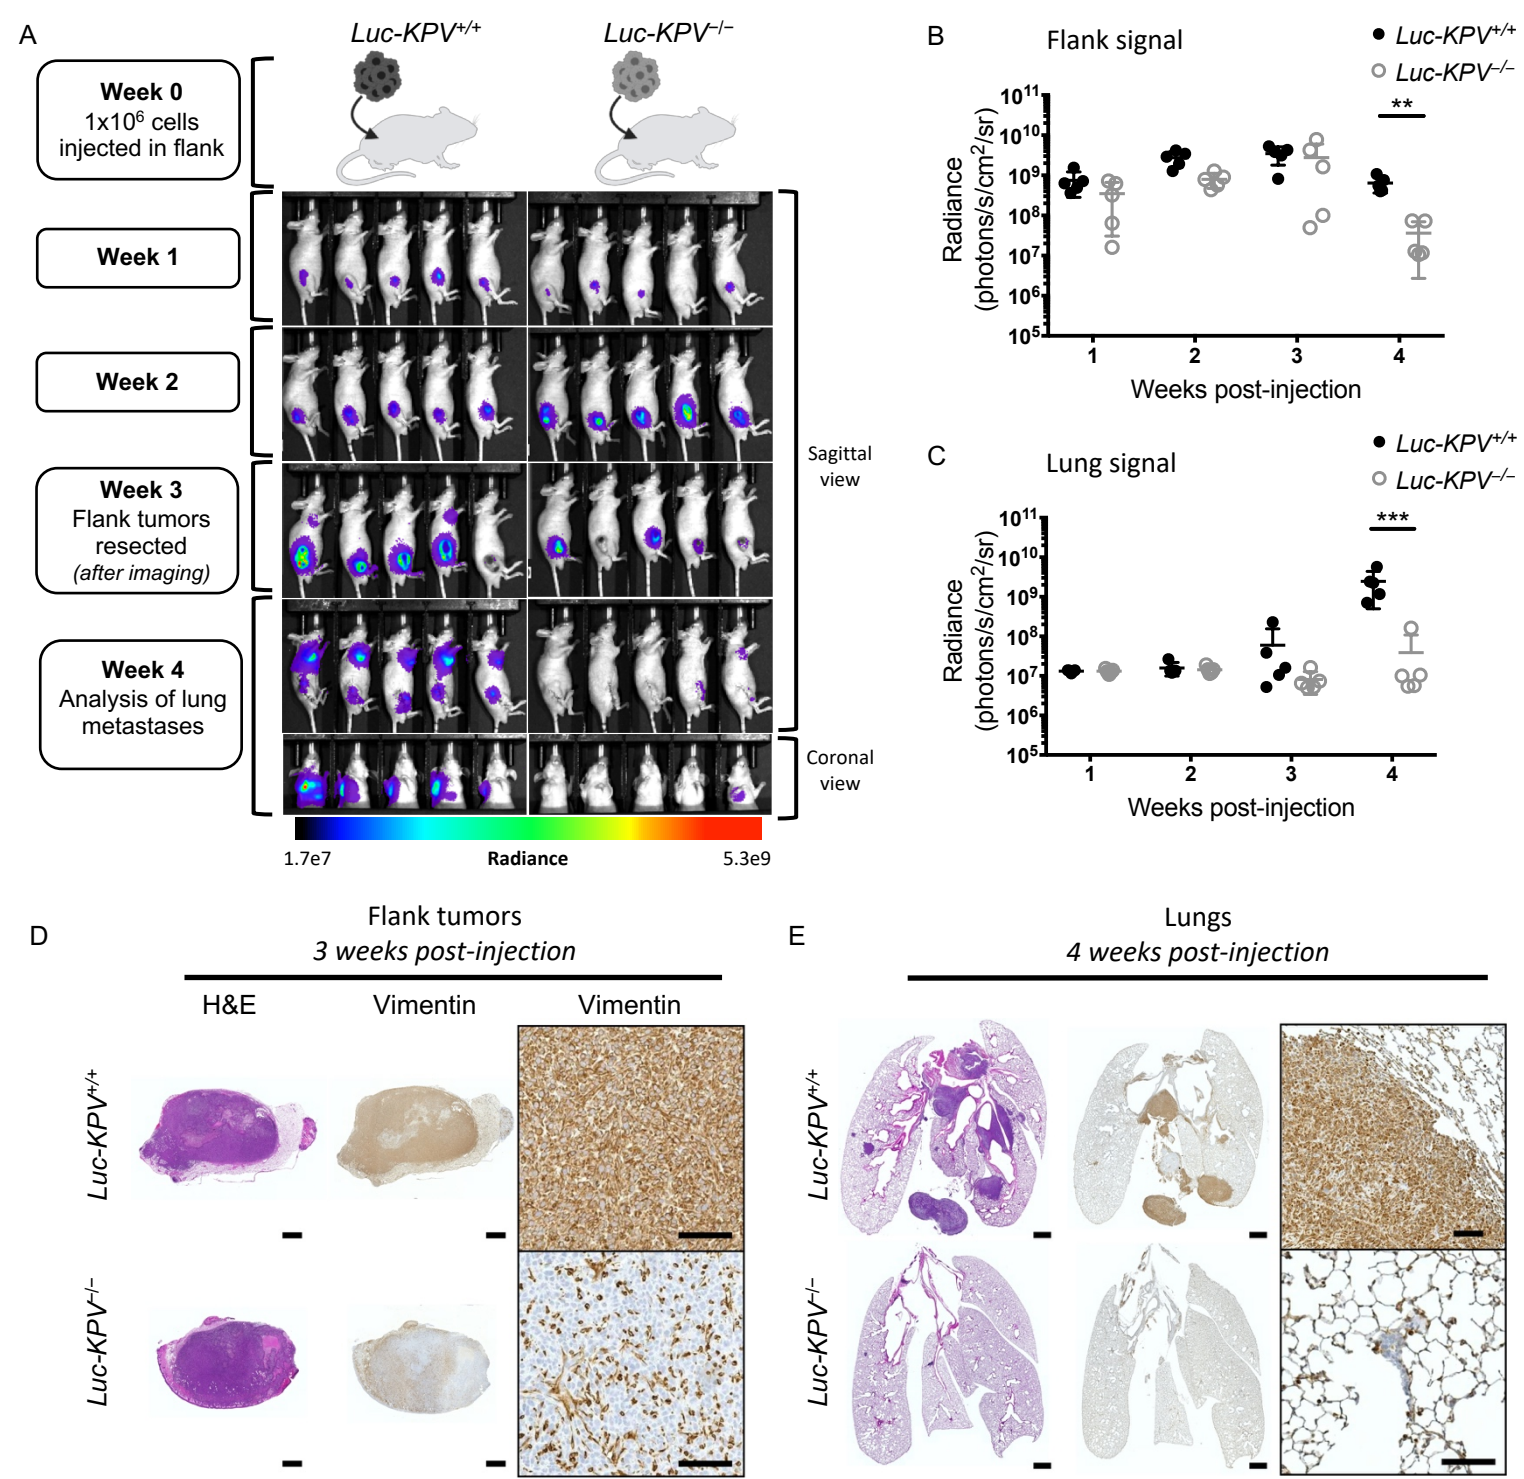

**Figure 7. Vimentin is required for accelerated lung cancer metastasis.** (A) Schematic of experimental design and accompanying IVIS images. A total of 1x10<sup>6</sup> KPV<sup>+/+</sup> or KPV<sup>-/-</sup> cells labeled with luciferase (*Luc-KPV<sup>+/+</sup>* or *Luc-KPV<sup>-/-</sup>*, respectively) were injected subcutaneously into the right flank of nude mice. At 3 weeks post-injection, primary tumors were removed and lung metastases were tracked for an additional 1 week. Shown are representative IVIS images of mice (n=5 per group). For week 4, both sagittal and coronal views are shown. Coronal view was acquired after masking the flank tumor to minimize bleed-through of the signal. Intensity overlay shows the accumulation of luciferase-labeled cells. Luciferin signal was quantified from (B) primary flank tumors and (C) lungs. Lung radiance was quantified from masked images. Unpaired t-tests were used to compare *Luc-KPV<sup>+/+</sup>* and *Luc-KPV<sup>-/-</sup>* conditions at each time point (\*\*p<0.01; \*\*\*p<0.001). Flank tumors (D) harvested at week 3 and lungs (E) harvested at week 4 were fixed, sectioned, and subjected to H&E staining and vimentin immunohistochemical staining. Positive vimentin staining is brown, and nuclei are blue. Scale bars: 1 mm (whole tumor/lung, left), 50 μm (inset, right).
